# Supplementary material for: Using natural language processing (NLP)-inspired molecular embedding approach to predict Hansen solubility parameters
Source: Royal Society of Chemistry journal article supplement (doi:10.1039/d3dd00119a), 2023-11-29
Supplement: d3dd00119a1.pdf [file d3dd00119a1.pdf]

## Electronic Supplementary Information (ESI)

### Using Natural Language Processing (NLP)-Inspired Molecular Embedding Approach to Predict Hansen Solubility Parameters

Jiayun Pang,<sup>\*a</sup> Alexander Pine<sup>a</sup> and Abdulai Sulemana<sup>a</sup>

---

a. *School of Science, Faculty of Engineering and Science, University of Greenwich  
Medway Campus, Central Avenue, Chatham Maritime, ME4 3RL, United Kingdom  
Email: [j.pang@gre.ac.uk](mailto:j.pang@gre.ac.uk)*

#### Table of Contents

**Figure S1.** Illustration of static and contextual word embeddings using the word “mouse”.

**Figure S2.** Molecular weight distribution of the Hansen dataset and ESOL dataset.

**Figure S3.** Distribution of the values of  $\delta d$ ,  $\delta h$  and  $\delta p$  in the Hansen dataset.

**Figure S4.** Functional group analysis of the Hansen and ESOL datasets.

**Figure S5.** Functional group analysis of the outliers for (A)  $\delta d$ , (B)  $\delta h$ , (C)  $\delta p$  and (D) ESOL for four models and the full Hansen dataset.

**Figure S6.** The average molecular weight of the outliers.

**Figure S7:** The molecular weight distribution of the outliers in comparison to the full dataset.

**Table S1:** Visualisation of all attentions for Pyridazine and L-(-)-Ephedrine.

**Table S2.** The predicted HSP values that are two standardised residual deviation (SRD) away from the experimental values are selected as the outliers and are presented here.

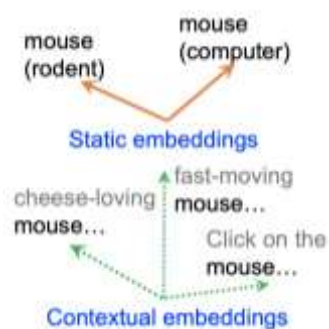

**Figure S1.** Illustration of static and contextual word embeddings using the word “mouse”. Static embeddings have one representation per word sense, while contextual embeddings are more context specific (Figure adapted from <https://ai.stanford.edu/blog/contextual/>).

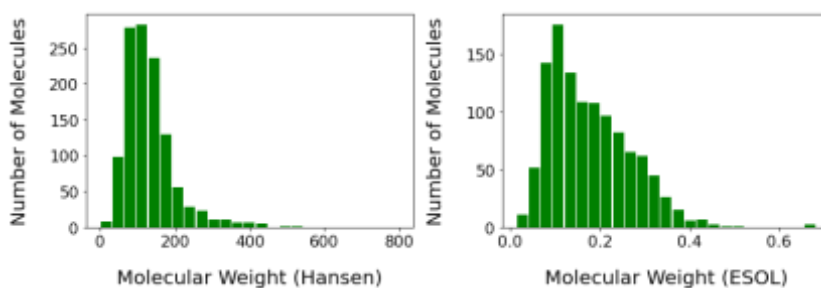

**Figure S2:** Molecular weight distribution of the Hansen dataset and ESOL dataset.

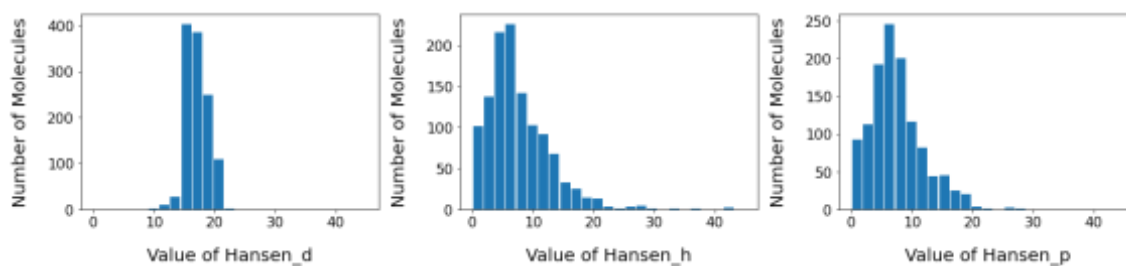

**Figure S3.** Distribution of the values of  $\delta_d$ ,  $\delta_h$  and  $\delta_p$  in the Hansen dataset.

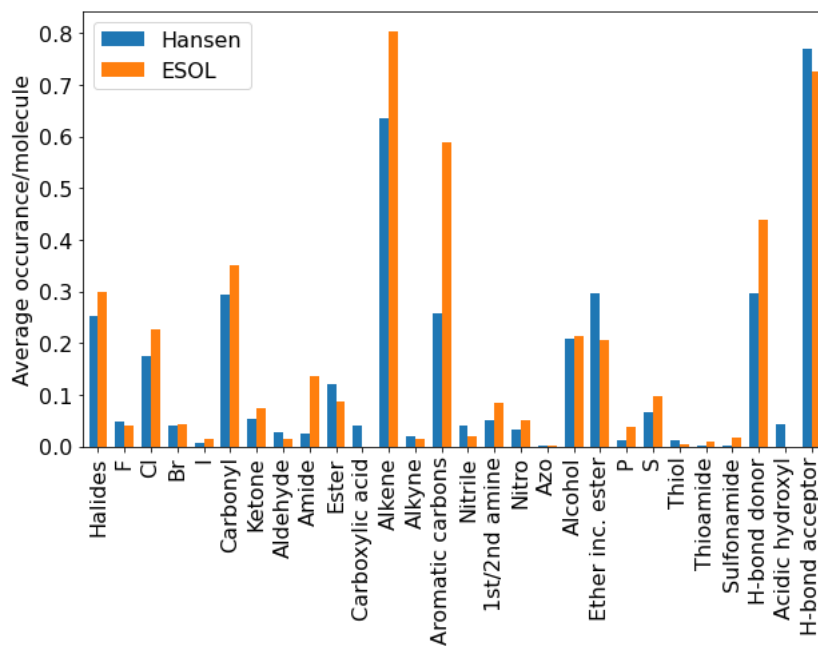

**Figure S4.** Functional group analysis of the Hansen and ESOL datasets.

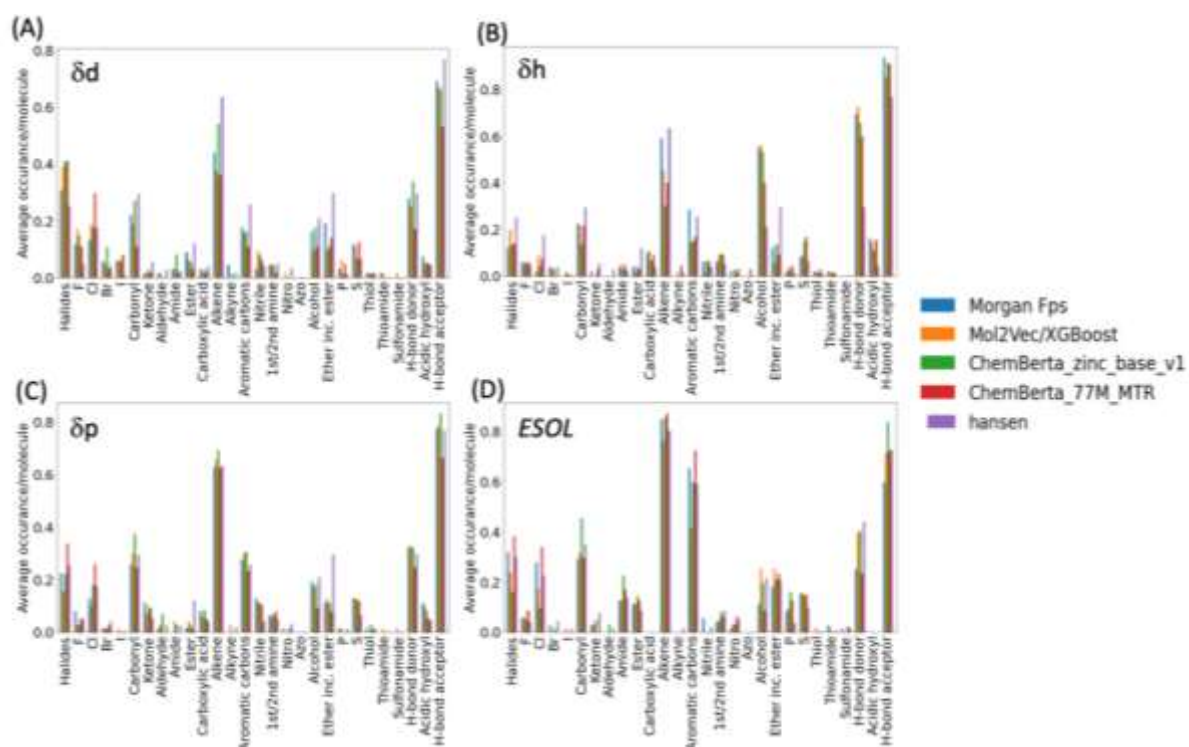

**Figure S5.** Functional group analysis of the outliers for (A)  $\delta d$ , (B)  $\delta h$ , (C)  $\delta p$  and (D) ESOL for four models and the full Hansen dataset. Functional groups were counted by matching their SMARTS codes to the SMILES strings using pybel/OpenBabel. The total number of each functional group was then divided by the total number of molecules in the dataset to derive the average occurrence per molecule.

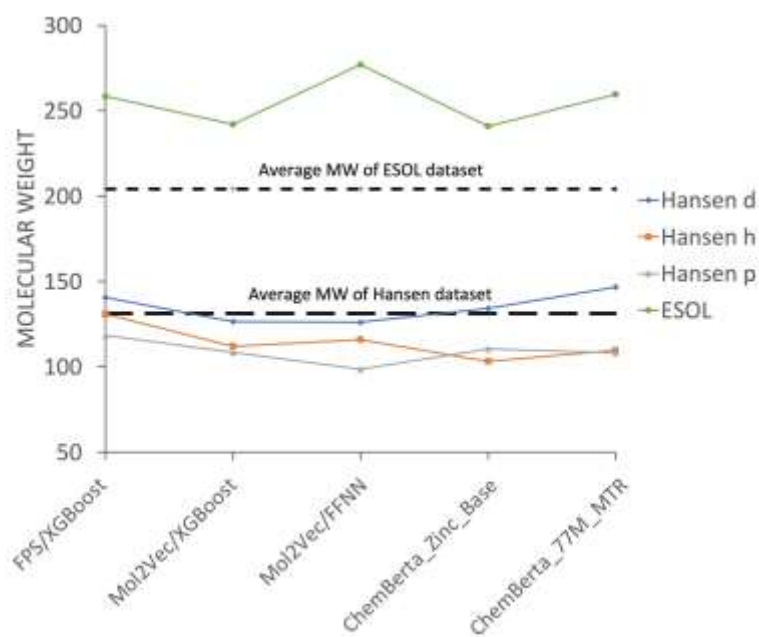

Figure S6. The average molecular weight of the outliers.

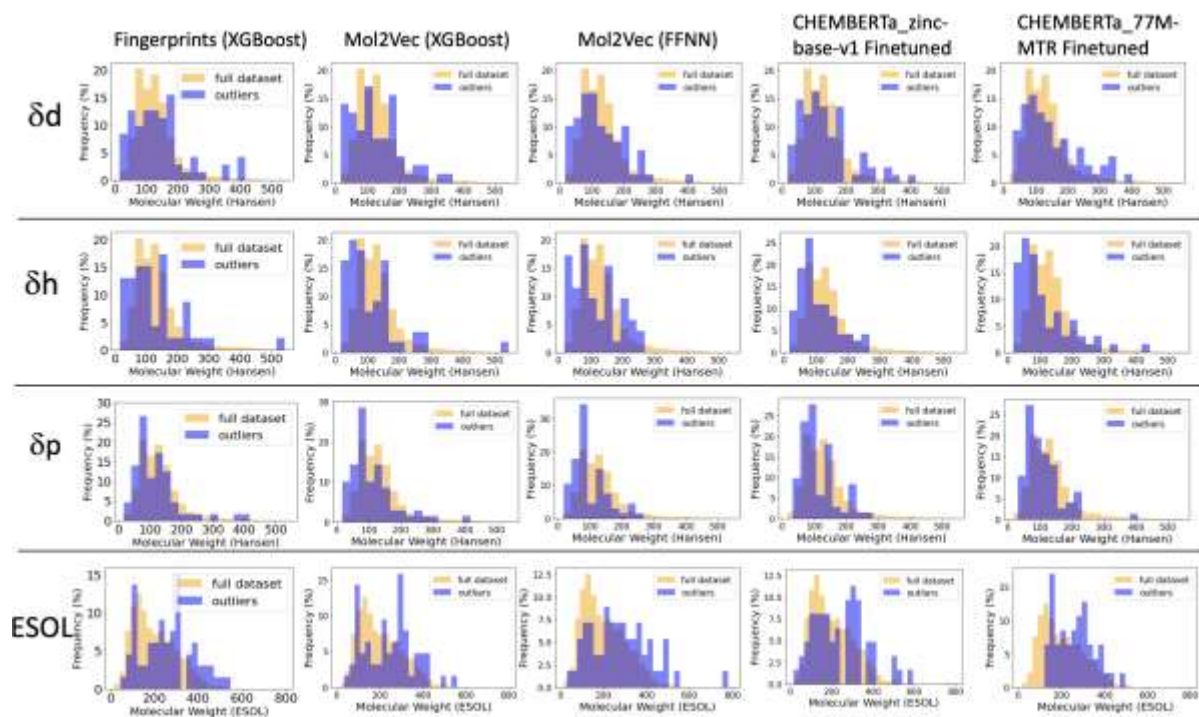

Figure S7: The molecular weight distribution of the outliers in comparison to the full dataset.

**Table S1:** Visualisation of all attentions for Pyridazine and L-(-)-Ephedrine.

| Molecule                                                                                                                                                                                                                                                                                                             | Model          | Attention                                                                            |
|----------------------------------------------------------------------------------------------------------------------------------------------------------------------------------------------------------------------------------------------------------------------------------------------------------------------|----------------|--------------------------------------------------------------------------------------|
| <p>Pyridazine</p> 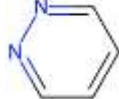 <p><chem>c1ccnnc1</chem></p> <p>Layer: 0</p>   | Original model |    |
|                                                                                                                                                                                                                                                                                                                      | $\delta d$     |    |
|                                                                                                                                                                                                                                                                                                                      | $\delta h$     |   |
|                                                                                                                                                                                                                                                                                                                      | $\delta p$     |  |
| <p>L-(-)-Ephedrine</p>  <p><chem>CN[C@@H](C)[C@H](O)c1ccccc1</chem></p>                                                                                                                                                           | Original model |  |

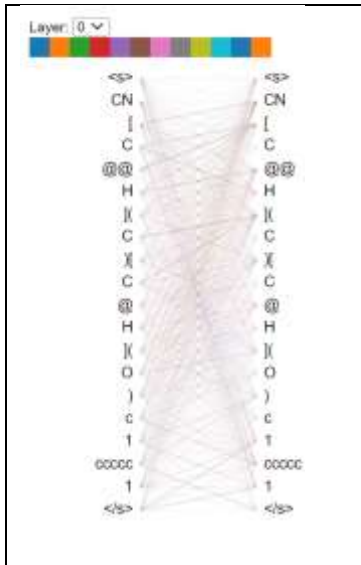

$\delta d$

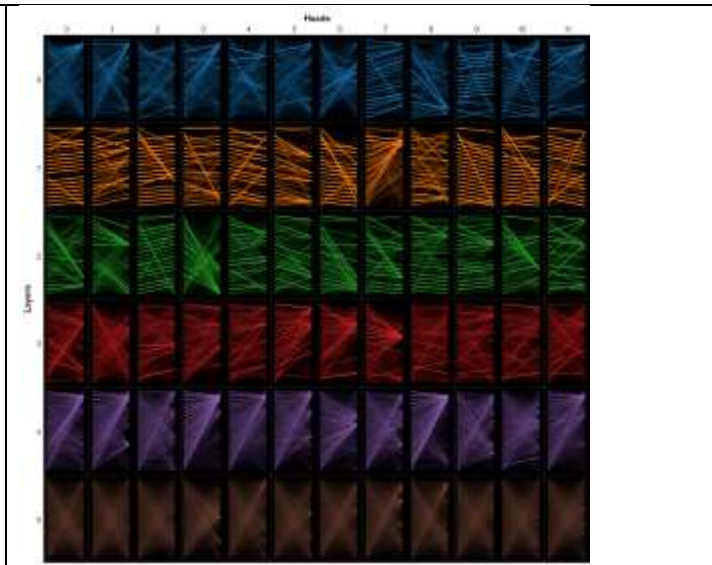

$\delta h$

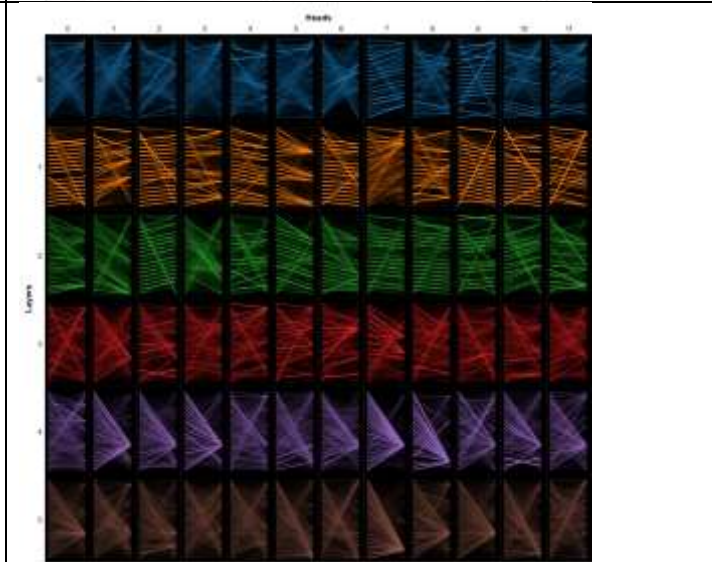

$\delta p$

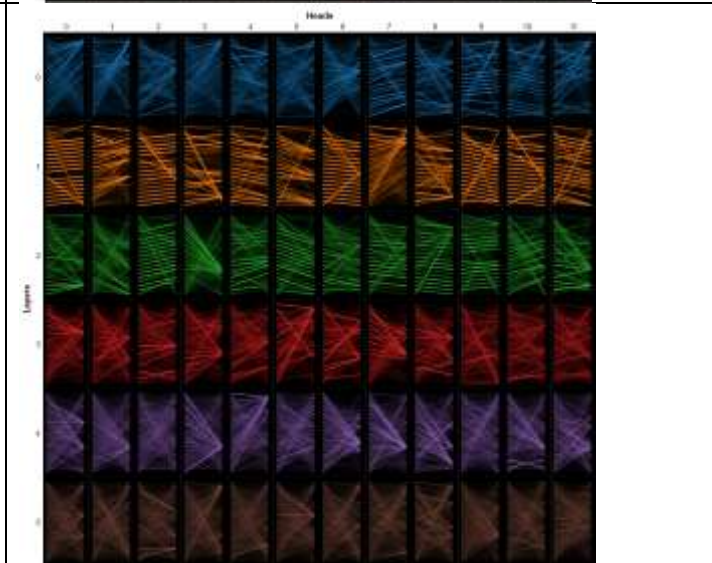

**Table S2.** The predicted HSP values that are two standardised residual deviation (SRD) away from the experimental values are selected as the outliers and are presented here.

|    | <b>Morgan fingerprint/XGBOOST</b>        |                 |                  |
|----|------------------------------------------|-----------------|------------------|
|    | <b>SMILES (60 molecules)</b>             | <b>δd (exp)</b> | <b>δd (pred)</b> |
| 1  | <chem>C=CCN=C=S</chem>                   | 17              | 19.12078         |
| 2  | <chem>FC(F)(F)Br</chem>                  | 14.3            | 17.88144         |
| 3  | <chem>CCOC(=O)CCCC(=O)OCC</chem>         | 16.3            | 12.389435        |
| 4  | <chem>CF</chem>                          | 13.4            | 15.394183        |
| 5  | <chem>C=O</chem>                         | 12.8            | 15.971532        |
| 6  | <chem>CCCCCCCCCCCCOC(=O)C(C)=C</chem>    | 14.4            | 16.672253        |
| 7  | <chem>CN(C)CCOC(=O)COc1ccc(Cl)cc1</chem> | 16              | 19.62697         |
| 8  | <chem>C[P](F)(F)=O</chem>                | 14              | 16.214167        |
| 9  | <chem>C#CC#N</chem>                      | 15.5            | 13.476004        |
| 10 | <chem>BrC(Br)C(Br)Br</chem>              | 21              | 18.23203         |
| 11 | <chem>CC(Br)Br</chem>                    | 18.5            | 15.310307        |
| 12 | <chem>N</chem>                           | 13.7            | 16.582228        |
| 13 | <chem>C1CO1</chem>                       | 15.6            | 17.543549        |
| 14 | <chem>NN</chem>                          | 14.2            | 16.532194        |
| 15 | <chem>IC(=C)C=C</chem>                   | 19.9            | 16.946806        |
| 16 | <chem>IC(I)I</chem>                      | 20.2            | 17.987347        |
| 17 | <chem>CCCCCCCCC(C)(O)Oc1ccccc1</chem>    | 16.7            | 18.81298         |
| 18 | <chem>[O-][O+]=O</chem>                  | 19.8            | 16.88974         |
| 19 | <chem>ClCC(Cl)(Cl)Cl</chem>              | 18              | 15.49792         |
| 20 | <chem>FC(F)(Cl)C(F)(Cl)Cl</chem>         | 14.7            | 12.033137        |
| 21 | <chem>OC(=O)C(Cl)=C</chem>               | 19.1            | 16.077759        |
| 22 | <chem>CC(C)S</chem>                      | 16.3            | 13.730936        |
| 23 | <chem>OCCCCI</chem>                      | 17.5            | 15.38078         |
| 24 | <chem>C=CCCC=O</chem>                    | 15.5            | 17.99248         |
| 25 | <chem>NC(=O)NC(N)=O</chem>               | 20              | 16.65098         |
| 26 | <chem>FC(F)Cl</chem>                     | 12.3            | 15.7675705       |
| 27 | <chem>C#N</chem>                         | 12.3            | 16.055342        |
| 28 | <chem>CC1=CC(=O)CC(C)(C)C1</chem>        | 17              | 19.63967         |
| 29 | <chem>CC=C</chem>                        | 13.3            | 15.23298         |
| 30 | <chem>s1ccnc1</chem>                     | 20.5            | 17.588928        |
| 31 | <chem>FC(F)(Cl)C(F)(F)Cl</chem>          | 12.6            | 14.901509        |
| 32 | <chem>Cn1ccnc1</chem>                    | 19.7            | 17.37856         |
| 33 | <chem>CC1=CCC2CC1C2(C)C</chem>           | 16.9            | 18.82562         |
| 34 | <chem>C#C.C#C</chem>                     | 14.4            | 16.811045        |
| 35 | <chem>CCCCCCCCCCCCCCCC(=O)OCCCC</chem>   | 14.5            | 17.18572         |
| 36 | <chem>CCCCCOCCCCC</chem>                 | 16              | 18.055115        |
| 37 | <chem>OCCO.O[S](O)=O</chem>              | 20              | 16.513426        |
| 38 | <chem>CSc1ccccc1</chem>                  | 19.6            | 17.317583        |

|    |                                                                  |      |           |
|----|------------------------------------------------------------------|------|-----------|
| 39 | <chem>CC1CCC[S]1(=O)=O</chem>                                    | 19   | 16.766928 |
| 40 | <chem>O[N+](O)=O</chem>                                          | 13.5 | 16.808695 |
| 41 | <chem>C[Si](C)(C)O[Si](C)(C)O[Si](C)(C)C</chem>                  | 12.2 | 14.418021 |
| 42 | <chem>FC(F)(F)C1(F)C(F)(F)C(F)(F)C(F)(F)C(F)(F)C1(F)F</chem>     | 12.4 | 14.429077 |
| 43 | <chem>NCCc1c[nH]c2ccc(O)cc12</chem>                              | 18   | 20.42724  |
| 44 | <chem>CCCCC(CC)(CC)OC(=O)c1cccc1C(O)=O</chem>                    | 16.6 | 18.92403  |
| 45 | <chem>C=C1CC(=O)O1</chem>                                        | 16.2 | 18.128946 |
| 46 | <chem>C</chem>                                                   | 14   | 16.592916 |
| 47 | <chem>C[N+]1(O)CCOCC1</chem>                                     | 19   | 16.707497 |
| 48 | <chem>C[Si](C)(C)O[Si](C)(C)C</chem>                             | 12.6 | 16.35119  |
| 49 | <chem>C#Cc1cccc1</chem>                                          | 18.8 | 16.36547  |
| 50 | <chem>O[P](O)(O)=O</chem>                                        | 14.7 | 17.428555 |
| 51 | <chem>CCC</chem>                                                 | 13.1 | 15.44409  |
| 52 | <chem>CCO[Si](OCC)(OCC)OCC</chem>                                | 13.9 | 16.911234 |
| 53 | <chem>NC(N)=S</chem>                                             | 20   | 18.001728 |
| 54 | <chem>Cl[SiH](Cl)Cl</chem>                                       | 14.2 | 17.201168 |
| 55 | <chem>NC(=O)c1cccc1</chem>                                       | 21.2 | 19.24533  |
| 56 | <chem>[Br]</chem>                                                | 18.2 | 16.266197 |
| 57 | <chem>CC(CCl)OC(C)CCl</chem>                                     | 19   | 16.155499 |
| 58 | <chem>C[S](C)(=O)=O</chem>                                       | 19   | 16.660654 |
| 59 | <chem>C[S](C)=O</chem>                                           | 18.4 | 16.312098 |
| 60 | <chem>O=C1CCCCCN1</chem>                                         | 19.4 | 17.227629 |
| 61 | <chem>OC=O</chem>                                                | 14.6 | 16.66062  |
| 62 | <chem>OC(F)(C(F)F)C(F)(F)F</chem>                                | 17.2 | 11.573037 |
| 63 | <chem>Cc1c(C)c(C)c(C)c(C)c1C</chem>                              | 19.2 | 16.717941 |
| 64 | <chem>IC(=C)C=C</chem>                                           | 17.2 | 19.152853 |
| 65 | <chem>CC1=CN([C@@H]2O[C@H](CO)[C@@H](O)[C@H]2O)C(=O)NC1=O</chem> | 17   | 20.89644  |
| 66 | <chem>ICI</chem>                                                 | 22   | 17.053907 |
| 67 | <chem>CCCCCCCCCc1cccc1O</chem>                                   | 16.5 | 18.689426 |
| 68 | <chem>CC1COC(=O)O1</chem>                                        | 20   | 17.753138 |

| <b>Morgan Fingerprint/XGBOOST</b> |                                          |                  |                   |
|-----------------------------------|------------------------------------------|------------------|-------------------|
| No.                               | SMILES (60 molecules)                    | $\delta d$ (exp) | $\delta d$ (pred) |
| 1                                 | <chem>C=CCN=C=S</chem>                   | 17               | 19.1              |
| 2                                 | <chem>FC(F)(F)Br</chem>                  | 14.3             | 17.9              |
| 3                                 | <chem>CCOC(=O)CCCC(=O)OCC</chem>         | 16.3             | 12.4              |
| 4                                 | <chem>CF</chem>                          | 13.4             | 15.4              |
| 5                                 | <chem>C=O</chem>                         | 12.8             | 16.0              |
| 6                                 | <chem>CCCCCCCCCCCCOC(=O)C(C)=C</chem>    | 14.4             | 16.7              |
| 7                                 | <chem>CN(C)CCOC(=O)COc1ccc(Cl)cc1</chem> | 16               | 19.6              |
| 8                                 | <chem>C[P](F)(F)=O</chem>                | 14               | 16.2              |
| 9                                 | <chem>C#CC#N</chem>                      | 15.5             | 13.5              |



|    |                                                              |      |      |
|----|--------------------------------------------------------------|------|------|
| 10 | <chem>BrC(Br)C(Br)Br</chem>                                  | 21   | 18.2 |
| 11 | <chem>CC(Br)Br</chem>                                        | 18.5 | 15.3 |
| 12 | <chem>N</chem>                                               | 13.7 | 16.6 |
| 13 | <chem>C1CO1</chem>                                           | 15.6 | 17.5 |
| 14 | <chem>NN</chem>                                              | 14.2 | 16.5 |
| 15 | <chem>IC(=C)C=C</chem>                                       | 19.9 | 16.9 |
| 16 | <chem>IC(I)I</chem>                                          | 20.2 | 18.0 |
| 17 | <chem>CCCCCCCCC(C)(O)Oc1ccccc1</chem>                        | 16.7 | 18.8 |
| 18 | <chem>[O-][O+]=O</chem>                                      | 19.8 | 16.9 |
| 19 | <chem>ClCC(Cl)(Cl)Cl</chem>                                  | 18   | 15.5 |
| 20 | <chem>FC(F)(Cl)C(F)(Cl)Cl</chem>                             | 14.7 | 12.0 |
| 21 | <chem>OC(=O)C(Cl)=C</chem>                                   | 19.1 | 16.1 |
| 22 | <chem>CC(C)S</chem>                                          | 16.3 | 13.7 |
| 23 | <chem>OCCCCI</chem>                                          | 17.5 | 15.4 |
| 24 | <chem>C=CCCC=O</chem>                                        | 15.5 | 18.0 |
| 25 | <chem>NC(=O)NC(N)=O</chem>                                   | 20   | 16.7 |
| 26 | <chem>FC(F)Cl</chem>                                         | 12.3 | 15.8 |
| 27 | <chem>C#N</chem>                                             | 12.3 | 16.1 |
| 28 | <chem>CC1=CC(=O)CC(C)(C)C1</chem>                            | 17   | 19.6 |
| 29 | <chem>CC=C</chem>                                            | 13.3 | 15.2 |
| 30 | <chem>s1ccnc1</chem>                                         | 20.5 | 17.6 |
| 31 | <chem>FC(F)(Cl)C(F)(F)Cl</chem>                              | 12.6 | 14.9 |
| 32 | <chem>Cn1ccnc1</chem>                                        | 19.7 | 17.4 |
| 33 | <chem>CC1=CCC2CC1C2(C)C</chem>                               | 16.9 | 18.8 |
| 34 | <chem>C#C.C#C</chem>                                         | 14.4 | 16.8 |
| 35 | <chem>CCCCCCCCCCCCCCCCC(=O)OCCCC</chem>                      | 14.5 | 17.2 |
| 36 | <chem>CCCCCOCCCCC</chem>                                     | 16   | 18.1 |
| 37 | <chem>OCCO.O[S](O)=O</chem>                                  | 20   | 16.5 |
| 38 | <chem>CSc1ccccc1</chem>                                      | 19.6 | 17.3 |
| 39 | <chem>CC1CCC[S]1(=O)=O</chem>                                | 19   | 16.8 |
| 40 | <chem>O[N+](O-)=O</chem>                                     | 13.5 | 16.8 |
| 41 | <chem>C[Si](C)(C)O[Si](C)(C)O[Si](C)(C)C</chem>              | 12.2 | 14.4 |
| 42 | <chem>FC(F)(F)C1(F)C(F)(F)C(F)(F)C(F)(F)C(F)(F)C1(F)F</chem> | 12.4 | 14.4 |
| 43 | <chem>NCCc1c[nH]c2ccc(O)cc12</chem>                          | 18   | 20.4 |
| 44 | <chem>CCCCC(CC)(CC)OC(=O)c1ccccc1C([O-])=O</chem>            | 16.6 | 18.9 |
| 45 | <chem>C=C1CC(=O)O1</chem>                                    | 16.2 | 18.1 |
| 46 | <chem>C</chem>                                               | 14   | 16.6 |
| 47 | <chem>C[N+](O-)[C]C(O)C1</chem>                              | 19   | 16.7 |
| 48 | <chem>C[Si](C)(C)O[Si](C)(C)C</chem>                         | 12.6 | 16.4 |
| 49 | <chem>C#Cc1ccccc1</chem>                                     | 18.8 | 16.4 |
| 50 | <chem>O[P](O)(O)=O</chem>                                    | 14.7 | 17.4 |
| 51 | <chem>CCC</chem>                                             | 13.1 | 15.4 |

|    |                                                                  |      |      |
|----|------------------------------------------------------------------|------|------|
| 52 | <chem>CCO[Si](OCC)(OCC)OCC</chem>                                | 13.9 | 16.9 |
| 53 | <chem>NC(N)=S</chem>                                             | 20   | 18.0 |
| 54 | <chem>Cl[SiH](Cl)Cl</chem>                                       | 14.2 | 17.2 |
| 55 | <chem>NC(=O)c1ccccc1</chem>                                      | 21.2 | 19.2 |
| 56 | <chem>[Br]</chem>                                                | 18.2 | 16.3 |
| 57 | <chem>CC(CCl)OC(C)CCl</chem>                                     | 19   | 16.2 |
| 58 | <chem>C[S](C)(=O)=O</chem>                                       | 19   | 16.7 |
| 59 | <chem>C[S](C)=O</chem>                                           | 18.4 | 16.3 |
| 60 | <chem>O=C1CCCCCN1</chem>                                         | 19.4 | 17.2 |
| 61 | <chem>OC=O</chem>                                                | 14.6 | 16.7 |
| 62 | <chem>OC(F)(C(F)F)C(F)(F)F</chem>                                | 17.2 | 11.6 |
| 63 | <chem>Cc1c(C)c(C)c(C)c(C)c1C</chem>                              | 19.2 | 16.7 |
| 64 | <chem>IC(=C)C=C</chem>                                           | 17.2 | 19.2 |
| 65 | <chem>CC1=CN([C@@H]2O[C@H](CO)[C@@H](O)[C@H]2O)C(=O)NC1=O</chem> | 17   | 20.9 |
| 66 | <chem>ICI</chem>                                                 | 22   | 17.1 |
| 67 | <chem>CCCCCCCCc1ccccc1O</chem>                                   | 16.5 | 18.7 |
| 68 | <chem>CC1COC(=O)O1</chem>                                        | 20   | 17.8 |

| No. | Morgan Fingerprint/XGBOOST                             |                  |                   |
|-----|--------------------------------------------------------|------------------|-------------------|
|     | SMILES (60 molecules)                                  | $\delta h$ (exp) | $\delta h$ (pred) |
| 1   | <chem>OCCC#N</chem>                                    | 17.6             | 10.3              |
| 2   | <chem>CF</chem>                                        | 9.5              | 2.0               |
| 3   | <chem>C=O</chem>                                       | 15.4             | 7.2               |
| 4   | <chem>COO</chem>                                       | 30               | 11.1              |
| 5   | <chem>CN[C@@H](C)[C@H](O)c1ccccc1</chem>               | 24.1             | 15.5              |
| 6   | <chem>Oc1c(cc(cc1[N+]([O-])=O)[N+](O)[N+](O))=O</chem> | 6                | 15.9              |
| 7   | <chem>[nH]1cnc2ncncc12</chem>                          | 14.2             | 6.1               |
| 8   | <chem>c1ccncc1</chem>                                  | 5.9              | 13.4              |
| 9   | <chem>CC(C)(c1ccc(O)cc1)c2c(Br)cc(OBr)c(Br)c2Br</chem> | 13.8             | 27.8              |
| 10  | <chem>Oc1ccc(O)cc1</chem>                              | 27.2             | 15.8              |
| 11  | <chem>Cc1ccc(O)c(c1)C(C)(C)C</chem>                    | 10.5             | 23.5              |
| 12  | <chem>CC=NO</chem>                                     | 20.2             | 8.5               |
| 13  | <chem>N</chem>                                         | 18.8             | 6.5               |
| 14  | <chem>OO</chem>                                        | 42.7             | 13.1              |
| 15  | <chem>CO</chem>                                        | 22.3             | 9.9               |
| 16  | <chem>[O-][O+]=O</chem>                                | 0                | 7.9               |
| 17  | <chem>FC(F)=C(F)F</chem>                               | 0                | 12.6              |
| 18  | <chem>OC(=O)c1[nH]c2cc(O)c(O)cc2c1</chem>              | 10.6             | 19.2              |
| 19  | <chem>BrC#N</chem>                                     | 0                | 13.2              |
| 20  | <chem>COC(=O)CCC(C)C(=O)OC</chem>                      | 5                | 12.7              |
| 21  | <chem>COC(C)(C)C.OCCO</chem>                           | 8.2              | 15.4              |



|    |                                              |      |      |
|----|----------------------------------------------|------|------|
| 10 | Clc1ccc(cc1)C#N                              | 8    | 14.6 |
| 11 | O=C1C(=O)c2ccccc2c3ccccc13                   | 17.1 | 9.6  |
| 12 | C=CC[N+]#[C-]                                | 13   | 6.7  |
| 13 | N                                            | 16.7 | 6.0  |
| 14 | S=C=S                                        | 0    | 6.3  |
| 15 | NC=O                                         | 26.2 | 11.9 |
| 16 | OO                                           | 12.2 | 6.1  |
| 17 | CNC=O                                        | 18.8 | 11.1 |
| 18 | [O-][O+]=O                                   | 4.2  | 15.6 |
| 19 | CCc1ccc(CC)cc1                               | 0    | 7.4  |
| 20 | FC(F)=C(F)F                                  | 0    | 8.8  |
| 21 | CC(=O)C#N                                    | 18.9 | 12.3 |
| 22 | Cl[S](Cl)=O                                  | 6.4  | 13.1 |
| 23 | CC(Cl)=C(Cl)Cl                               | 15.7 | 6.5  |
| 24 | NC1(CC1)C(O)=O                               | 6.3  | 13.5 |
| 25 | CC(C)=CC(C)=O                                | 7.2  | 14.7 |
| 26 | CC(=C)C#N                                    | 9.5  | 17.2 |
| 27 | Cl[S](Cl)(=O)=O                              | 7.2  | 15.1 |
| 28 | s1ccnc1                                      | 18.8 | 10.9 |
| 29 | CC1(C)C2CC3C(C2)C13C                         | 0    | 6.3  |
| 30 | O                                            | 16   | 8.2  |
| 31 | [nH]1nnc2ccccc12                             | 15.6 | 8.7  |
| 32 | CCCCCOC(=O)c1ccccc1C(=O)OCC                  | 6.2  | 12.5 |
| 33 | C1OC1C2CO2                                   | 14.4 | 4.4  |
| 34 | O=C=S                                        | 3.7  | 11.6 |
| 35 | [Ca++].NC#N                                  | 27.6 | 13.7 |
| 36 | NCCO                                         | 15.5 | 9.0  |
| 37 | CC1CCC[S]1(=O)=O                             | 17.4 | 10.8 |
| 38 | OC(=O)C(O)=O                                 | 17   | 8.5  |
| 39 | CC1=CNC(=O)NC1=O                             | 20.5 | 11.2 |
| 40 | C/C=C/C#N                                    | 18.8 | 11.9 |
| 41 | Cc1ccc(c(c1[N+](O-)=O)[N+](O-)=O)[N+](O-)=O) | 3.5  | 11.5 |
| 42 | Cc1cccc2ccccc12                              | 0.8  | 7.9  |
| 43 | CCCC=C                                       | 1.4  | 7.7  |
| 44 | CC(=O)c1ccc(cc1)C(F)(F)F                     | 6.1  | 12.3 |
| 45 | COc1ccc(cc1)C#N                              | 16.7 | 10.0 |
| 46 | O=C(C#N)C#N                                  | 6.3  | 14.9 |
| 47 | CCN=[CH+]                                    | 15.2 | 6.8  |
| 48 | CCOCC.OCC(O)CO.OCC(O)=O                      | 18.5 | 10.7 |
| 49 | Fc1c(F)c(F)c(F)c(F)c1F                       | 0    | 7.2  |
| 50 | CN=C=S                                       | 16.2 | 5.7  |
| 51 | C[N+]1(O-)[C]OCC1                            | 16.1 | 6.0  |

|    |                                                                         |      |      |
|----|-------------------------------------------------------------------------|------|------|
| 52 | <chem>O[P](O)(O)=O</chem>                                               | 18.6 | 11.8 |
| 53 | <chem>c1ccnnc1</chem>                                                   | 17.4 | 9.9  |
| 54 | <chem>CCCCCCCC\C=C/CCCCCCCCOCCOCCOCCO</chem>                            | 3.1  | 15.5 |
| 55 | <chem>O=C1c2ccccc2C(=O)c3ccccc13</chem>                                 | 7.6  | 14.9 |
| 56 | <chem>[Br]</chem>                                                       | 14.9 | 5.8  |
| 57 | <chem>ClC(Cl)(Cl)Cl</chem>                                              | 0    | 6.3  |
| 58 | <chem>COC(Cl)Cl</chem>                                                  | 12.9 | 6.4  |
| 59 | <chem>CC(=C)C(O)=O</chem>                                               | 2.8  | 11.7 |
| 60 | <chem>ClC(=O)C(Cl)=O</chem>                                             | 3.8  | 10.9 |
| 61 | <chem>FC(F)(F)C(F)(F)C(F)(F)C(F)(F)C(F)(F)C(F)(F)C(F)(F)C(F)(F)F</chem> | 0    | 6.1  |
| 62 | <chem>SC#N</chem>                                                       | 8.9  | 15.5 |

| No. | Mol2Vec/FFNN<br>SMILES                   | $\delta d$ (exp) | $\delta d$ (pred) |
|-----|------------------------------------------|------------------|-------------------|
| 1   | <chem>CCSC#N</chem>                      | 15.4             | 17.9              |
| 2   | <chem>FC(F)Cl</chem>                     | 12.3             | 16.1              |
| 3   | <chem>ClP(Cl)Cl</chem>                   | 18.4             | 15.5              |
| 4   | <chem>ClC(Cl)=C(Cl)Cl</chem>             | 18.3             | 15.7              |
| 5   | <chem>C[N+]1([O-])CCOCC1</chem>          | 19               | 16.2              |
| 6   | <chem>NC(=O)NC(N)=O</chem>               | 20               | 16.1              |
| 7   | <chem>Cc1c(C)c(C)c(C)c(C)c1C</chem>      | 19.2             | 16.1              |
| 8   | <chem>[O-][O+]=O</chem>                  | 19.8             | 15.9              |
| 9   | <chem>C=C</chem>                         | 15               | 10.9              |
| 10  | <chem>C[S](C)(=O)=O</chem>               | 19               | 15.4              |
| 11  | <chem>IC(=C)C=C</chem>                   | 19.9             | 15.9              |
| 12  | <chem>O=[S]1CCCC1</chem>                 | 18.2             | 12.6              |
| 13  | <chem>CN(C)CCOC(=O)COc1ccc(Cl)cc1</chem> | 16               | 18.9              |
| 14  | <chem>N#CCCC#N</chem>                    | 18.2             | 14.0              |
| 15  | <chem>[Cl]</chem>                        | 17.3             | 12.0              |
| 16  | <chem>CSSC</chem>                        | 17.6             | 14.0              |
| 17  | <chem>S1C=CSC1=C2SC=CS2</chem>           | 21               | 14.7              |
| 18  | <chem>C1OC1C2CO2</chem>                  | 18.3             | 15.8              |
| 19  | <chem>N=C=O</chem>                       | 15.8             | 18.8              |
| 20  | <chem>C#C.C#C</chem>                     | 14.4             | 11.1              |
| 21  | <chem>BrCCBr</chem>                      | 19.2             | 16.7              |
| 22  | <chem>CC=CC</chem>                       | 14.6             | 12.1              |
| 23  | <chem>OCCO.O[S](O)=O</chem>              | 20               | 16.2              |
| 24  | <chem>CC=CC</chem>                       | 14.7             | 12.1              |
| 25  | <chem>ClC(Cl)(Cl)C(Cl)(Cl)Cl</chem>      | 18.6             | 14.2              |
| 26  | <chem>[nH]1c2ccccc2c3ccccc13</chem>      | 21.7             | 19.1              |

|    |                                                                  |      |      |
|----|------------------------------------------------------------------|------|------|
| 27 | <chem>C1C(Cl)(Cl)C(=O)C(Cl)(Cl)Cl</chem>                         | 18.3 | 15.6 |
| 28 | <chem>CC1CCC[S]1(=O)=O</chem>                                    | 19   | 16.3 |
| 29 | <chem>CC</chem>                                                  | 15.5 | 12.6 |
| 30 | <chem>O[N+](=[O-])=O</chem>                                      | 13.5 | 16.2 |
| 31 | <chem>C[S](C)=O</chem>                                           | 18.4 | 12.9 |
| 32 | <chem>C#N</chem>                                                 | 12.3 | 15.7 |
| 33 | <chem>c1cncnc1</chem>                                            | 20.5 | 17.7 |
| 34 | <chem>CC1=CN([C@@H]2O[C@H](CO)[C@@H](O)[C@H]2O)C(=O)NC1=O</chem> | 17   | 20.0 |
| 35 | <chem>ICI</chem>                                                 | 22   | 17.5 |
| 36 | <chem>C1C(Cl)(Cl)C1(Cl)Cl</chem>                                 | 18.5 | 14.9 |
| 37 | <chem>FC(F)=C(F)F</chem>                                         | 15.1 | 11.8 |
| 38 | <chem>S</chem>                                                   | 17.9 | 13.3 |
| 39 | <chem>ClCBr</chem>                                               | 17.3 | 19.9 |
| 40 | <chem>CC#CC</chem>                                               | 15.1 | 12.1 |
| 41 | <chem>COc1c(Cl)cc(Cl)cc1Cl</chem>                                | 21   | 18.3 |
| 42 | <chem>FC(F)(F)c1ccc(Cl)c(Cl)c1</chem>                            | 20   | 17.2 |
| 43 | <chem>IC(I)I</chem>                                              | 20.2 | 15.6 |
| 44 | <chem>OC(F)(C(F)F)C(F)(F)F</chem>                                | 17.2 | 13.8 |
| 45 | <chem>C1C=CCl</chem>                                             | 17   | 14.2 |
| 46 | <chem>Oc1c(Cl)c(Cl)c(Cl)c(Cl)c1Cl</chem>                         | 21.5 | 18.3 |
| 47 | <chem>NC(N)=S</chem>                                             | 20   | 16.5 |
| 48 | <chem>CC1COC(=O)O1</chem>                                        | 20   | 16.2 |
| 49 | <chem>S=C=S</chem>                                               | 19.9 | 15.0 |
| 50 | <chem>FC(F)(F)c1cc(Cl)ccc1Cl</chem>                              | 20   | 17.3 |
| 51 | <chem>Oc1cccc(O)c1O</chem>                                       | 20.7 | 18.1 |
| 52 | <chem>CC(C)=CC(C)=O</chem>                                       | 16.4 | 13.6 |
| 53 | <chem>CN(C)[P](=O)(N(C)C)N(C)C</chem>                            | 18.5 | 15.3 |
| 54 | <chem>S=C=S</chem>                                               | 20.2 | 15.0 |
| 55 | <chem>OCC(O)C(O)C(O)CO</chem>                                    | 18   | 15.3 |
| 56 | <chem>N</chem>                                                   | 13.7 | 9.9  |
| 57 | <chem>SS</chem>                                                  | 17.3 | 14.2 |
| 58 | <chem>s1ccnc1</chem>                                             | 20.5 | 17.5 |
| 59 | <chem>[Br]</chem>                                                | 18.2 | 13.1 |
| 60 | <chem>C1CCCCl</chem>                                             | 18   | 15.1 |
| 61 | <chem>C[P](F)(F)=O</chem>                                        | 14   | 16.5 |
| 62 | <chem>Cl[SiH](Cl)Cl</chem>                                       | 14.2 | 17.1 |
| 63 | <chem>C1N2CN3CN1CN(C2)C3</chem>                                  | 19.4 | 13.2 |
| 64 | <chem>C1C(Cl)C(Cl)(Cl)Cl</chem>                                  | 18.2 | 15.7 |
| 65 | <chem>C1C(Cl)C(Cl)Cl</chem>                                      | 18.8 | 14.4 |
| 66 | <chem>O</chem>                                                   | 15.5 | 10.6 |
| 67 | <chem>C1c2ccccc2c3ccccc13</chem>                                 | 21.3 | 18.5 |
| 68 | <chem>CC1OC(=O)OC1C</chem>                                       | 18   | 15.2 |

|    |                                   |      |      |
|----|-----------------------------------|------|------|
| 69 | <chem>Clc1cc(Cl)c(Cl)cc1Cl</chem> | 21.2 | 18.4 |
|----|-----------------------------------|------|------|

| No. | Mol2Vec/FFNN<br>SMILES                                           | $\delta h$ (exp) | $\delta h$ (pred) |
|-----|------------------------------------------------------------------|------------------|-------------------|
| 1   | <chem>N=C=O</chem>                                               | 13.6             | 7.0               |
| 2   | <chem>FC=C</chem>                                                | 1                | 8.2               |
| 3   | <chem>OO</chem>                                                  | 42.7             | 25.9              |
| 4   | <chem>COC(C)(C)C.OCCOCCO</chem>                                  | 7.2              | 13.9              |
| 5   | <chem>CC(O)=O.CC(O)=O.OCCO</chem>                                | 9.8              | 20.2              |
| 6   | <chem>CN(C)C</chem>                                              | 1.8              | 8.5               |
| 7   | <chem>OC(=O)c1[nH]c2cc(O)c(O)cc2c1</chem>                        | 10.6             | 20.2              |
| 8   | <chem>COO</chem>                                                 | 30               | 14.8              |
| 9   | <chem>CCCCOC.OCCO</chem>                                         | 4.9              | 14.3              |
| 10  | <chem>CC(O)=O.CC(O)=O.OCC(O)CO</chem>                            | 14.2             | 21.5              |
| 11  | <chem>OCCCCO.OC(=O)C=C.OC(=O)C=C</chem>                          | 4.2              | 17.3              |
| 12  | <chem>Cn1cnc2nc(Cl)nc(Cl)c12</chem>                              | 14.2             | 8.1               |
| 13  | <chem>CC(O)C(O)=O</chem>                                         | 28.4             | 19.4              |
| 14  | <chem>CC1(C)C2CC3C(C2)C13C</chem>                                | 0                | 6.9               |
| 15  | <chem>CC(=O)Nc1cccc1</chem>                                      | 13.5             | 6.1               |
| 16  | <chem>Oc1ccc(O)cc1</chem>                                        | 27.2             | 17.2              |
| 17  | <chem>CO</chem>                                                  | 10               | 19.8              |
| 18  | <chem>CCCCOCC.OCCO</chem>                                        | 4.6              | 12.7              |
| 19  | <chem>OC(=O)C(O)=O</chem>                                        | 26               | 19.1              |
| 20  | <chem>CC1=CN([C@@H]2O[C@H](CO)[C@@H](O)[C@H]2O)C(=O)NC1=O</chem> | 32.8             | 19.3              |
| 21  | <chem>C1N2CN3CN1CN(C2)C3</chem>                                  | 16               | 3.8               |
| 22  | <chem>CC(O)=O.CC(O)=O.OCCCCCO</chem>                             | 7.2              | 16.4              |
| 23  | <chem>CCOCC.OCC(O)CO.OC(O)=O</chem>                              | 8.7              | 19.8              |
| 24  | <chem>CC(N)=S</chem>                                             | 20.2             | 9.8               |
| 25  | <chem>OCC(O)CO.OC(O)=O</chem>                                    | 17.4             | 26.0              |
| 26  | <chem>O=[S]1CCCC1</chem>                                         | 9.1              | 2.9               |
| 27  | <chem>O</chem>                                                   | 42.3             | 13.6              |
| 28  | <chem>CN</chem>                                                  | 16               | 9.7               |
| 29  | <chem>CC(C)(C)O</chem>                                           | 14.7             | 8.5               |
| 30  | <chem>C[S](C)=O</chem>                                           | 10.2             | 4.0               |
| 31  | <chem>CN[C@@H](C)[C@H](O)c1cccc1</chem>                          | 24.1             | 11.7              |
| 32  | <chem>CF</chem>                                                  | 9.5              | 1.9               |
| 33  | <chem>C=O</chem>                                                 | 15.4             | 4.9               |
| 34  | <chem>CC(C)(O)C#N</chem>                                         | 15.5             | 8.6               |
| 35  | <chem>CC(O)=S</chem>                                             | 8.9              | 15.1              |
| 36  | <chem>CC(N)=O</chem>                                             | 19.3             | 13.0              |
| 37  | <chem>NN</chem>                                                  | 8.9              | 20.0              |

|    |                                          |      |      |
|----|------------------------------------------|------|------|
| 38 | <chem>OCCO.O[S](O)=O</chem>              | 5.1  | 23.8 |
| 39 | <chem>OCC(O)C(O)C(O)CO</chem>            | 36   | 25.8 |
| 40 | <chem>C#C.C#C</chem>                     | 11.9 | 5.9  |
| 41 | <chem>CC(O)=O.OCC(O)CO.OC(O)=O</chem>    | 9.2  | 25.0 |
| 42 | <chem>Oc1c(Cl)c(Cl)c(Cl)c(Cl)c1Cl</chem> | 12.8 | 6.9  |
| 43 | <chem>C[S](C)(=O)=O</chem>               | 12.3 | 5.2  |
| 44 | <chem>OC(F)(C(F)F)C(F)(F)F</chem>        | 14.7 | 4.5  |
| 45 | <chem>CC=NO</chem>                       | 20.2 | 13.8 |
| 46 | <chem>CCN=C=S</chem>                     | 9    | 2.0  |
| 47 | <chem>O=C1CCC(=O)O1</chem>               | 16   | 8.5  |
| 48 | <chem>CN=C=S</chem>                      | 10.1 | 2.8  |
| 49 | <chem>S</chem>                           | 10.2 | 1.9  |
| 50 | <chem>Cl[P](Cl)(Cl)=O</chem>             | 0    | 5.9  |
| 51 | <chem>ClB(Cl)Cl</chem>                   | 0    | 6.5  |
| 52 | <chem>N#CSC#N</chem>                     | 0    | 6.7  |

| No. | Mol2Vec/FFNN<br>SMILES                                         | $\delta p$ (exp) | $\delta p$ (pred) |
|-----|----------------------------------------------------------------|------------------|-------------------|
| 1   | <chem>OCC(O)CO.OC(O)=O</chem>                                  | 25.5             | 12.5              |
| 2   | <chem>[nH]1cnc2ccccc12</chem>                                  | 14.9             | 7.0               |
| 3   | <chem>Nc1ccncc1</chem>                                         | 16.1             | 10.1              |
| 4   | <chem>S=C=S</chem>                                             | 0                | 7.3               |
| 5   | <chem>[Ca++].NC#N</chem>                                       | 27.6             | 18.0              |
| 6   | <chem>O=C1C(=O)c2ccccc2c3ccccc13</chem>                        | 17.1             | 7.9               |
| 7   | <chem>C=CC[N+]#[C-]</chem>                                     | 13               | 5.4               |
| 8   | <chem>CF</chem>                                                | 10.6             | 4.6               |
| 9   | <chem>C1COCCO1</chem>                                          | 1.8              | 9.6               |
| 10  | <chem>CCCCCCCCC(C)(O)Oc1ccccc1</chem>                          | 10.2             | 3.1               |
| 11  | <chem>NC=O</chem>                                              | 26.2             | 17.0              |
| 12  | <chem>CC(N)=O</chem>                                           | 18.7             | 12.8              |
| 13  | <chem>CC(=O)C(C)=O</chem>                                      | 5.1              | 11.2              |
| 14  | <chem>CC(F)(F)F</chem>                                         | 10               | 2.9               |
| 15  | <chem>Cc1ccc(c(c1[N+]([O-])=O)[N+]([O-])=O)[N+]([O-])=O</chem> | 3.5              | 13.9              |
| 16  | <chem>CC1=CNC(=O)NC1=O</chem>                                  | 20.5             | 12.7              |
| 17  | <chem>Oc1c(cc(cc1[N+]([O-])=O)[N+]([O-])=O)[N+]([O-])=O</chem> | 7                | 13.8              |
| 18  | <chem>[Cl]</chem>                                              | 10               | 1.2               |
| 19  | <chem>C/C=C/C#N</chem>                                         | 18.8             | 9.1               |
| 20  | <chem>CC(F)=O</chem>                                           | 14               | 8.1               |
| 21  | <chem>CC(Cl)=C(Cl)Cl</chem>                                    | 15.7             | 5.9               |
| 22  | <chem>OC(=O)C(O)=O</chem>                                      | 17               | 10.3              |



|    |                              |      |      |
|----|------------------------------|------|------|
| 23 | C/C=C/C=O                    | 14.9 | 7.8  |
| 24 | C[S](O)(=O)=O.C=C            | 9.3  | 17.3 |
| 25 | C#N                          | 17.6 | 7.2  |
| 26 | o1cccc1                      | 1.8  | 9.8  |
| 27 | CC1OC(=O)OC1C                | 16.8 | 9.7  |
| 28 | [Br]                         | 14.9 | 1.2  |
| 29 | N#CC1CC1                     | 16.2 | 10.0 |
| 30 | CCN=[CH+]                    | 15.2 | 8.4  |
| 31 | NC=C                         | 7.2  | 14.2 |
| 32 | CN=C=S                       | 16.2 | 5.2  |
| 33 | O=C1OCC=C1                   | 19.8 | 12.5 |
| 34 | CCN=C=S                      | 14.7 | 5.3  |
| 35 | O                            | 16   | 8.4  |
| 36 | CC1(C)C2CC3C(C2)C13C         | 0    | 6.1  |
| 37 | O=C1C=C2NC=CC2=CC1=O         | 9.3  | 16.7 |
| 38 | CC(=O)Nc1cccc1               | 14.4 | 7.9  |
| 39 | C[N+](=O)C1COC1              | 16.1 | 2.8  |
| 40 | COc1ccc(cc1)C#N              | 16.7 | 10.0 |
| 41 | COO                          | 15   | 7.4  |
| 42 | O=C1OC=CO1                   | 18.1 | 9.6  |
| 43 | CC(N)=S                      | 20.6 | 13.2 |
| 44 | s1ccnc1                      | 18.8 | 11.0 |
| 45 | c1ccnnc1                     | 17.4 | 9.7  |
| 46 | CCNC=O                       | 10   | 16.2 |
| 47 | C=O                          | 14.4 | 6.0  |
| 48 | CC(O)=O.CC(O)=O.OCCO         | 4.7  | 12.9 |
| 49 | O=C1OCCO1                    | 21.7 | 14.3 |
| 50 | ClC=C(Cl)Cl                  | 3.1  | 9.1  |
| 51 | [O-][N+](=O)OCCO[N+](=O)[O-] | 18   | 11.8 |
| 52 | OC=O                         | 10   | 18.9 |
| 53 | O=C(C#N)C#N                  | 6.3  | 18.3 |
| 54 | Cl[S](Cl)(=O)=O              | 7.2  | 13.7 |
| 55 | ClC(=O)C(Cl)=O               | 3.8  | 11.0 |
| 56 | CCOCC.OCC(O)CO.OC(O)=O       | 18.5 | 10.4 |
| 57 | CC(=C)C(O)=O                 | 2.8  | 8.7  |
| 58 | ClC(Cl)(Cl)C=C               | 15.5 | 5.1  |
| 59 | ClC#C                        | 2.1  | 8.4  |
| 60 | Cc1ccon1                     | 14.8 | 8.0  |
| 61 | [nH]1nnc2ccccc12             | 15.6 | 9.5  |
| 62 | [O-][O+]=O                   | 4.2  | 11.8 |
| 63 | CN                           | 7    | 13.9 |
| 64 | NN                           | 8.3  | 19.8 |

|    |                        |      |     |
|----|------------------------|------|-----|
| 65 | C1OC1C2CO2             | 14.4 | 6.4 |
| 66 | Fc1c(F)c(F)c(F)c(F)c1F | 0    | 6.9 |
| 67 | CNC(C)=O               | 17   | 8.5 |

| No. | Mol2Vec/XGBOOST<br>SMILES                 | $\delta d$ (exp) | $\delta d$ (pred) |
|-----|-------------------------------------------|------------------|-------------------|
| 1   | SCCS                                      | 17.9             | 16.1              |
| 2   | FC(F)(F)c1cccc(c1)C(F)(F)F                | 17               | 14.5              |
| 3   | FC(F)(F)c1cc(Cl)ccc1Cl                    | 20               | 17.0              |
| 4   | Cc1ccon1                                  | 19.4             | 16.4              |
| 5   | CCCCCCCCCCCCCCCCCCCC                      | 16.5             | 14.6              |
| 6   | CF                                        | 13.4             | 15.8              |
| 7   | C=O                                       | 12.8             | 15.3              |
| 8   | O=CC=O                                    | 15               | 17.1              |
| 9   | CN(C)CCOC(=O)COc1ccc(Cl)cc1               | 16               | 18.2              |
| 10  | C[P](F)(F)=O                              | 14               | 16.7              |
| 11  | N#CCCC#N                                  | 18.2             | 16.3              |
| 12  | [O-][N+](=O)C([N+](=[O-])=O)[N+](=[O-])=O | 15.5             | 18.9              |
| 13  | BrC(Br)C(Br)Br                            | 21               | 17.9              |
| 14  | Oc1ccc(O)cc1                              | 21               | 18.9              |
| 15  | N                                         | 13.7             | 15.9              |
| 16  | C=[N+]=[N-]                               | 14.7             | 17.9              |
| 17  | FC(F)(Cl)Cl                               | 14.9             | 16.9              |
| 18  | NN                                        | 14.2             | 16.4              |
| 19  | IC(=C)C=C                                 | 19.9             | 17.2              |
| 20  | [O-][O+]=O                                | 19.8             | 15.3              |
| 21  | CC1CO1                                    | 15.2             | 17.3              |
| 22  | FC(F)(Cl)C(F)(Cl)Cl                       | 14.7             | 16.9              |
| 23  | OC(=O)C(Cl)=C                             | 19.1             | 15.9              |
| 24  | CNCC(O)c1ccc(O)c(O)c1                     | 20.5             | 17.9              |
| 25  | NC(=O)NC(N)=O                             | 20               | 17.0              |
| 26  | FC(F)Cl                                   | 12.3             | 16.2              |
| 27  | BrC#N                                     | 18.3             | 15.6              |
| 28  | ClC(Cl)(Cl)C(=O)C(Cl)(Cl)Cl               | 18.3             | 16.0              |
| 29  | C#N                                       | 12.3             | 16.1              |
| 30  | Cl[P](Cl)(Cl)=O                           | 18.1             | 15.8              |
| 31  | Cc1ccc(cc1N=C=O)N=C=O                     | 19.3             | 17.4              |
| 32  | ClC(Cl)C(Cl)Cl                            | 18.8             | 16.4              |
| 33  | FC(F)(Cl)C(F)(F)Cl                        | 12.6             | 14.8              |
| 34  | CCCCCCCCCCCCCCCC(=O)OCCCC                 | 14.5             | 16.5              |

|    |                                |      |      |
|----|--------------------------------|------|------|
| 35 | C1C=C1                         | 17.2 | 14.1 |
| 36 | N#CC1CC1                       | 18.6 | 16.5 |
| 37 | CSSC                           | 17.6 | 15.2 |
| 38 | CC                             | 15.5 | 13.6 |
| 39 | O[N+](=O)=O                    | 13.5 | 17.3 |
| 40 | FC(F)(F)C(F)(F)C(F)(F)C(F)(F)F | 10.6 | 14.1 |
| 41 | O=[S]1CCCC1                    | 18.2 | 16.1 |
| 42 | [nH]1c2ccccc2c3ccccc13         | 21.7 | 19.0 |
| 43 | COC(C)COC(C)COC(C)=O           | 16.3 | 14.5 |
| 44 | C                              | 14   | 17.7 |
| 45 | O[P](O)(O)=O                   | 14.7 | 17.1 |
| 46 | CCC                            | 13.1 | 15.2 |
| 47 | CCO[Si](OCC)(OCC)OCC           | 13.9 | 16.1 |
| 48 | NC(N)=S                        | 20   | 17.0 |
| 49 | Cl[SiH](Cl)Cl                  | 14.2 | 16.9 |
| 50 | CN(C)C                         | 14.6 | 16.7 |
| 51 | CO[P](=O)(OC)OC                | 15.7 | 17.5 |
| 52 | FC(F)(F)C(=O)OC=C              | 13.9 | 16.5 |
| 53 | NC(=O)c1ccccc1                 | 21.2 | 19.3 |
| 54 | [Br]                           | 18.2 | 15.7 |
| 55 | N#CC#N                         | 15.1 | 17.3 |
| 56 | C[S](C)(=O)=O                  | 19   | 14.7 |
| 57 | CCl                            | 17.5 | 15.7 |
| 58 | OC(F)(C(F)F)C(F)(F)F           | 17.2 | 13.0 |
| 59 | S                              | 17.9 | 15.0 |
| 60 | IC(=C)C=C                      | 17.2 | 19.9 |
| 61 | ICI                            | 22   | 18.3 |
| 62 | CC1COC(=O)O1                   | 20   | 18.0 |
| 63 | O=C1N[S](=O)(=O)c2ccccc12      | 21.1 | 19.1 |
| 64 | CIC(Cl)(Cl)C#N                 | 16.4 | 18.5 |

| <b>Mol2Vec/XGBOOST</b> |                             |                  |                   |
|------------------------|-----------------------------|------------------|-------------------|
| No.                    | SMILES                      | $\delta h$ (exp) | $\delta h$ (pred) |
| 1                      | CC1(O)CCCCC1                | 12               | 4.8               |
| 2                      | OC1CCC=C1                   | 15.6             | 5.4               |
| 3                      | CC(=O)Nc1ccccc1             | 13.5             | 4.8               |
| 4                      | C1CC1                       | 0                | 6.7               |
| 5                      | C=O                         | 15.4             | 8.5               |
| 6                      | OCC(O)CO.OC(O)=O            | 17.4             | 31.4              |
| 7                      | CC(O)=O.OCC(O)CO.OC(O)=O    | 9.2              | 21.2              |
| 8                      | COO                         | 30               | 10.1              |
| 9                      | CN[C@@H](C)[C@H](O)c1ccccc1 | 24.1             | 10.6              |

|    |                                                        |      |      |
|----|--------------------------------------------------------|------|------|
| 10 | <chem>CC(C)(c1ccc(O)cc1)c2c(Br)cc(OBr)c(Br)c2Br</chem> | 13.8 | 6.0  |
| 11 | <chem>OCC(F)(F)F</chem>                                | 16.4 | 9.8  |
| 12 | <chem>OCC#C</chem>                                     | 18.8 | 8.1  |
| 13 | <chem>CC=NO</chem>                                     | 20.2 | 11.8 |
| 14 | <chem>N</chem>                                         | 18.8 | 9.3  |
| 15 | <chem>COc1cc(CC=C)ccc1O</chem>                         | 13   | 5.9  |
| 16 | <chem>FC=C</chem>                                      | 1    | 7.8  |
| 17 | <chem>NN</chem>                                        | 8.9  | 16.5 |
| 18 | <chem>OO</chem>                                        | 42.7 | 15.0 |
| 19 | <chem>CO</chem>                                        | 22.3 | 10.0 |
| 20 | <chem>OCCN1CCCC1=O</chem>                              | 15.7 | 8.3  |
| 21 | <chem>CNC=O</chem>                                     | 15.9 | 8.3  |
| 22 | <chem>ClP(Cl)Cl</chem>                                 | 0    | 6.7  |
| 23 | <chem>O=C1OC(=O)c2ccccc12</chem>                       | 4.1  | 11.0 |
| 24 | <chem>CC(C)CC(C)(C)C</chem>                            | 0    | 6.9  |
| 25 | <chem>OCC(Cl)=C</chem>                                 | 16.4 | 5.2  |
| 26 | <chem>CC1CCC(O)CC1</chem>                              | 12.5 | 5.7  |
| 27 | <chem>C1N2CN3CN1CN(C2)C3</chem>                        | 16   | 8.2  |
| 28 | <chem>Cl[P](Cl)(Cl)=O</chem>                           | 0    | 7.8  |
| 29 | <chem>CC(N)=S</chem>                                   | 20.2 | 10.7 |
| 30 | <chem>O</chem>                                         | 42.3 | 16.7 |
| 31 | <chem>CC(C)O</chem>                                    | 16.4 | 8.5  |
| 32 | <chem>[Ca++].NC#N</chem>                               | 16.8 | 9.8  |
| 33 | <chem>C1CC=CC1</chem>                                  | 1.7  | 11.0 |
| 34 | <chem>CC</chem>                                        | 0    | 9.8  |
| 35 | <chem>OCCO.O[S](O)=O</chem>                            | 5.1  | 26.3 |
| 36 | <chem>CC(O)C(O)=O</chem>                               | 28.4 | 16.8 |
| 37 | <chem>O[N+](=[O-])=O</chem>                            | 18.6 | 6.3  |
| 38 | <chem>OC(=O)C(O)=O</chem>                              | 26   | 14.0 |
| 39 | <chem>OC(=O)CS</chem>                                  | 20   | 12.1 |
| 40 | <chem>OCC(Br)=C</chem>                                 | 16.2 | 7.9  |
| 41 | <chem>CC(N)=O</chem>                                   | 19.3 | 11.6 |
| 42 | <chem>Oc1ccc(cc1)[S](=O)(=O)c2ccc(O)cc2</chem>         | 16.3 | 7.3  |
| 43 | <chem>Clc1c(Cl)c(Cl)c(Cl)c(Cl)c1Cl</chem>              | 0    | 6.9  |
| 44 | <chem>CN</chem>                                        | 16   | 5.6  |
| 45 | <chem>CN=C=S</chem>                                    | 10.1 | 2.8  |
| 46 | <chem>CCC</chem>                                       | 0    | 7.5  |
| 47 | <chem>CC(C)(C)O</chem>                                 | 14.7 | 5.5  |
| 48 | <chem>OC(=O)C(Cl)(Cl)Cl</chem>                         | 13   | 5.6  |
| 49 | <chem>CN(C)C</chem>                                    | 1.8  | 11.3 |
| 50 | <chem>OCC(O)C(O)C(O)CO</chem>                          | 36   | 17.0 |
| 51 | <chem>OC(F)(C(F)F)C(F)(F)F</chem>                      | 14.7 | 5.2  |

|    |                                                     |      |      |
|----|-----------------------------------------------------|------|------|
| 52 | CO                                                  | 10   | 22.3 |
| 53 | CC1=CN([C@@H]2O[C@H](CO)[C@@H](O)[C@H]2O)C(=O)NC1=O | 32.8 | 12.6 |
| 54 | ICI                                                 | 5.5  | 14.6 |
| 55 | OCCN(CCO)CCO                                        | 21   | 13.3 |

| No. | Mol2Vec/XGBOOST<br>SMILES         | $\delta p$ (exp) | $\delta p$ (pred) |
|-----|-----------------------------------|------------------|-------------------|
| 1   | N#Cc1occc1                        | 15               | 8.8               |
| 2   | ClC(Cl)(Cl)C=C                    | 15.5             | 3.7               |
| 3   | Cc1ccon1                          | 14.8             | 6.9               |
| 4   | [nH]1cnc2ccccc12                  | 14.9             | 6.6               |
| 5   | CCCCOC(=O)c1ccccc1C(=O)OCc2ccccc2 | 11.2             | 4.7               |
| 6   | C=O                               | 14.4             | 7.8               |
| 7   | OCC(O)CO.OC(O)=O                  | 25.5             | 12.9              |
| 8   | COO                               | 15               | 6.8               |
| 9   | C=CC#C                            | 1.7              | 8.4               |
| 10  | O=C1OC=CO1                        | 18.1             | 6.3               |
| 11  | S=C1CCCO1                         | 6.9              | 13.4              |
| 12  | O=C1C(=O)c2ccccc2c3ccccc13        | 17.1             | 7.6               |
| 13  | C=CC[N+]#[C-]                     | 13               | 5.8               |
| 14  | ClB(Cl)Cl                         | 2.5              | 12.0              |
| 15  | NC=O                              | 26.2             | 11.6              |
| 16  | OCCOC(=O)C=C                      | 13.2             | 6.9               |
| 17  | IC(I)I                            | 3.6              | 10.9              |
| 18  | CO                                | 12.3             | 5.0               |
| 19  | CN(C)C(C)=O                       | 11.5             | 4.2               |
| 20  | CNC=O                             | 18.8             | 12.3              |
| 21  | [O-][O+]=O                        | 4.2              | 12.4              |
| 22  | CC(Cl)=C(Cl)Cl                    | 15.7             | 6.0               |
| 23  | CC1OC(=O)OC1C                     | 16.8             | 9.8               |
| 24  | O=C=Nc1ccc(Cc2ccc(cc2)N=C=O)cc1   | 4.1              | 11.7              |
| 25  | ClC(Cl)(Cl)Cl                     | 8.3              | 0.0               |
| 26  | C#N                               | 17.6             | 9.5               |
| 27  | Cl[S](Cl)(=O)=O                   | 7.2              | 14.1              |
| 28  | s1ccnc1                           | 18.8             | 6.5               |
| 29  | CC(N)=S                           | 20.6             | 11.9              |
| 30  | O                                 | 16               | 7.4               |
| 31  | ClC#C                             | 2.1              | 9.7               |
| 32  | [Ca++].NC#N                       | 27.6             | 12.3              |

|    |                                                 |      |      |
|----|-------------------------------------------------|------|------|
| 33 | <chem>N#CC1CC1</chem>                           | 16.2 | 9.2  |
| 34 | <chem>CC</chem>                                 | 0    | 9.2  |
| 35 | <chem>CC1(C)CO1</chem>                          | 4.8  | 11.3 |
| 36 | <chem>O[N+]([O-])=O</chem>                      | 18   | 11.4 |
| 37 | <chem>OC(=O)C(O)=O</chem>                       | 17   | 8.4  |
| 38 | <chem>CC1=CNC(=O)NC1=O</chem>                   | 20.5 | 12.0 |
| 39 | <chem>C/C=C/C#N</chem>                          | 18.8 | 6.8  |
| 40 | <chem>Nc1ccncc1</chem>                          | 16.1 | 8.9  |
| 41 | <chem>COc1ccc(cc1)C#N</chem>                    | 16.7 | 10.4 |
| 42 | <chem>Oc1ccc(cc1)[S](=O)(=O)c2ccc(O)cc2</chem>  | 14.6 | 8.1  |
| 43 | <chem>O=C(C#N)C#N</chem>                        | 6.3  | 14.8 |
| 44 | <chem>C/C=C/C=O</chem>                          | 14.9 | 6.2  |
| 45 | <chem>CCN=[CH+]</chem>                          | 15.2 | 6.1  |
| 46 | <chem>CCOC(=O)C(=C)C#N</chem>                   | 10.3 | 3.9  |
| 47 | <chem>CCOCC.OCC(O)CO.OCC(O)=O</chem>            | 18.5 | 9.2  |
| 48 | <chem>Fc1c(F)c(F)c(F)c(F)c1F</chem>             | 0    | 8.5  |
| 49 | <chem>C</chem>                                  | 0    | 12.4 |
| 50 | <chem>CNC(C)=O</chem>                           | 17   | 10.3 |
| 51 | <chem>C[N+](=O)[O-]CCOCC1</chem>                | 16.1 | 9.6  |
| 52 | <chem>Fc1c(F)c(F)c(c(F)c1F)C(=O)c2ccccc2</chem> | 8.1  | 1.6  |
| 53 | <chem>O[P](O)(O)=O</chem>                       | 18.6 | 12.0 |
| 54 | <chem>CCC</chem>                                | 0    | 7.6  |
| 55 | <chem>c1ccnnc1</chem>                           | 17.4 | 10.2 |
| 56 | <chem>O=[S]1(=O)CCCC1</chem>                    | 17.4 | 9.9  |
| 57 | <chem>CC(O)=S</chem>                            | 6.7  | 13.2 |
| 58 | <chem>s1cccc1</chem>                            | 2.4  | 9.7  |
| 59 | <chem>C[CH]=[C]=[CH2]</chem>                    | 1.7  | 8.0  |
| 60 | <chem>O=C1c2ccccc2C(=O)c3ccccc13</chem>         | 7.6  | 17.1 |
| 61 | <chem>NC(=O)c1ccccc1</chem>                     | 14.7 | 5.1  |
| 62 | <chem>[Br]</chem>                               | 14.9 | 5.0  |
| 63 | <chem>CC(=O)C(C)=O</chem>                       | 5.1  | 13.9 |
| 64 | <chem>ClC(Cl)(Cl)Cl</chem>                      | 0    | 8.3  |
| 65 | <chem>C[S](C)(=O)=O</chem>                      | 19.4 | 12.6 |
| 66 | <chem>O=Cc1occc1</chem>                         | 14.9 | 8.3  |
| 67 | <chem>CC(=C)C(O)=O</chem>                       | 2.8  | 10.2 |
| 68 | <chem>CO</chem>                                 | 5    | 12.3 |
| 69 | <chem>C[S](=O)(=O)c1ccccc1</chem>               | 16.9 | 10.0 |
| 70 | <chem>Nc1ccc(cc1)[S](N)(=O)=O</chem>            | 19.5 | 12.0 |

| CHEMBERTa_zinc-base-v1 |                                                                       |                  |                   |
|------------------------|-----------------------------------------------------------------------|------------------|-------------------|
| No.                    | SMILES (74 molecules)                                                 | $\delta d$ (exp) | $\delta d$ (pred) |
| 1                      | <chem>COC(=O)C(Cl)=C</chem>                                           | 15.9             | 17.7              |
| 2                      | <chem>CC1COC(=O)O1</chem>                                             | 20               | 17.7              |
| 3                      | <chem>BrC(Br)C(Br)Br</chem>                                           | 21               | 18.2              |
| 4                      | <chem>OC=O</chem>                                                     | 14.6             | 16.9              |
| 5                      | <chem>[SiH3]C=C</chem>                                                | 15.5             | 17.7              |
| 6                      | <chem>BrC(Br)Br</chem>                                                | 20               | 17.9              |
| 7                      | <chem>CC(CCl)OC(C)CCl</chem>                                          | 19               | 16.2              |
| 8                      | <chem>N</chem>                                                        | 13.7             | 15.6              |
| 9                      | <chem>Fc1c(F)c(F)c(F)c(F)c1F</chem>                                   | 16               | 18.1              |
| 10                     | <chem>Oc1cccc(O)c1O</chem>                                            | 20.7             | 18.9              |
| 11                     | <chem>BrC#C</chem>                                                    | 15.7             | 17.9              |
| 12                     | <chem>BrC=C</chem>                                                    | 15.9             | 17.8              |
| 13                     | <chem>C#N</chem>                                                      | 12.3             | 15.4              |
| 14                     | <chem>C[C@H]1C[C@H](C)C(=O)[C@@H](C1)[C@H](O)CC2CC(=O)NC(=O)C2</chem> | 18.3             | 16.2              |
| 15                     | <chem>CC\C(C)=N\O</chem>                                              | 14.7             | 16.6              |
| 16                     | <chem>Oc1cccc1O</chem>                                                | 20               | 18.2              |
| 17                     | <chem>O=C1OC=CO1</chem>                                               | 17.3             | 19.0              |
| 18                     | <chem>[SiH3]C(Cl)(Cl)Cl</chem>                                        | 16.5             | 19.3              |
| 19                     | <chem>C1CS1</chem>                                                    | 19.3             | 17.2              |
| 20                     | <chem>FCC=C</chem>                                                    | 14.9             | 16.8              |
| 21                     | <chem>Cl[SiH](Cl)Cl</chem>                                            | 14.2             | 17.7              |
| 22                     | <chem>FC(F)=C(F)C(F)=C(F)F</chem>                                     | 13.8             | 16.4              |
| 23                     | <chem>CC(=O)Nc1cccc1</chem>                                           | 20.6             | 18.1              |
| 24                     | <chem>NNc1cccc1</chem>                                                | 20.4             | 18.5              |
| 25                     | <chem>NC(=O)C=C</chem>                                                | 15.8             | 17.5              |
| 26                     | <chem>NC(=O)c1cccc1</chem>                                            | 21.2             | 19.4              |
| 27                     | <chem>FC(Cl)(Cl)Cl</chem>                                             | 15.3             | 17.0              |
| 28                     | <chem>Oc1ccc(O)cc1</chem>                                             | 21               | 18.7              |
| 29                     | <chem>CCSC#N</chem>                                                   | 15.4             | 17.2              |
| 30                     | <chem>OC(F)(C(F)F)C(F)(F)F</chem>                                     | 17.2             | 13.6              |
| 31                     | <chem>CN(C)[P](=O)(N(C)C)N(C)C</chem>                                 | 18.5             | 16.7              |
| 32                     | <chem>CIC(Cl)(Cl)C#N</chem>                                           | 16.4             | 18.1              |
| 33                     | <chem>FC(F)F</chem>                                                   | 14.4             | 12.6              |
| 34                     | <chem>NN</chem>                                                       | 14.2             | 16.5              |
| 35                     | <chem>CN(C)C=O</chem>                                                 | 17.4             | 15.2              |
| 36                     | <chem>NC(=O)NC(N)=O</chem>                                            | 20               | 18.2              |
| 37                     | <chem>O[N+](=[O-])=O</chem>                                           | 13.5             | 16.3              |
| 38                     | <chem>BrC=C(Br)Br</chem>                                              | 18.3             | 20.1              |
| 39                     | <chem>SS</chem>                                                       | 17.3             | 20.0              |

|    |                                                 |      |      |
|----|-------------------------------------------------|------|------|
| 40 | CC(F)F                                          | 14.9 | 13.1 |
| 41 | NCCc1c[nH]c2ccc(O)cc12                          | 18   | 20.3 |
| 42 | [O-][O+]=O                                      | 19.8 | 16.6 |
| 43 | FC(F)(F)C1(F)C(F)(F)C(F)(F)C(F)(F)C(F)(F)C1(F)F | 12.4 | 14.2 |
| 44 | CN(C)CCOC(=O)COc1ccc(Cl)cc1                     | 16   | 19.1 |
| 45 | CCCCCCCCCCCCOC(=O)C(C)=C                        | 14.4 | 16.6 |
| 46 | CIB(Cl)Cl                                       | 16.6 | 18.3 |
| 47 | N#CC#N                                          | 15.1 | 16.9 |
| 48 | BrCC=C                                          | 16.5 | 18.2 |
| 49 | CCCCCCCCCCCCCCCC(=O)OCCCC                       | 14.5 | 17.0 |
| 50 | C=O                                             | 12.8 | 15.1 |
| 51 | FC(F)Cl                                         | 12.3 | 15.4 |
| 52 | FC(F)(F)C1(C(F)(F)F)C(F)(F)C(F)(F)C(F)(F)C1(F)F | 12.4 | 14.2 |
| 53 | Cl[S](Cl)=O                                     | 16.9 | 18.6 |
| 54 | FC(F)(F)C(F)(F)C(F)(F)C(F)(F)F                  | 10.6 | 12.3 |
| 55 | IC(=C)C=C                                       | 17.2 | 20.2 |
| 56 | OCCO.O[S](O)=O                                  | 20   | 17.2 |
| 57 | OC(=O)C(Cl)=C                                   | 19.1 | 16.6 |
| 58 | OC1CCOC1                                        | 18.9 | 17.2 |
| 59 | CIC(=O)C(Cl)=O                                  | 16.1 | 18.4 |
| 60 | CNC=O                                           | 17.4 | 15.6 |
| 61 | CCC1COC(=O)O1                                   | 17.5 | 19.4 |
| 62 | CIC(Cl)(Cl)Cl                                   | 16.1 | 18.0 |
| 63 | IC(=C)C=C                                       | 19.9 | 17.6 |
| 64 | CC(=O)Nc1ccc(O)cc1                              | 17.8 | 20.0 |
| 65 | BrC#N                                           | 18.3 | 16.6 |
| 66 | C=C                                             | 15   | 12.6 |
| 67 | ICC=C                                           | 18.3 | 15.9 |
| 68 | o1ncc2ccccc12                                   | 20.6 | 18.9 |
| 69 | CCC                                             | 13.1 | 15.2 |
| 70 | O=C(C#N)C#N                                     | 15   | 16.7 |
| 71 | C1CCCCCCCCCCC1                                  | 16.4 | 18.1 |
| 72 | C=CN1CCCC1=O                                    | 16.4 | 18.3 |
| 73 | BrC(Br)=C                                       | 16.2 | 18.8 |
| 74 | ICI                                             | 22   | 16.9 |

| <b>CHEMBERTa_zinc-base-v1</b> |        |                  |                   |
|-------------------------------|--------|------------------|-------------------|
| No.                           | SMILES | $\delta h$ (exp) | $\delta h$ (pred) |
| 1                             | OCCC#N | 17.6             | 6.0               |
| 2                             | NCCO   | 21               | 6.5               |



|    |                                                     |      |      |
|----|-----------------------------------------------------|------|------|
| 3  | CC=NO                                               | 20.2 | 8.3  |
| 4  | S=C=S                                               | 0.6  | 9.5  |
| 5  | CCCCO                                               | 15.8 | 7.0  |
| 6  | O=C=S                                               | 0    | 11.3 |
| 7  | OC[CH]=[C]=[CH2]                                    | 16.8 | 10.3 |
| 8  | COO                                                 | 30   | 13.0 |
| 9  | COCCO                                               | 15   | 5.5  |
| 10 | CN[C@@H](C)[C@H](O)c1cccc1                          | 24.1 | 11.8 |
| 11 | O=C=Nc1ccc(Cc2ccc(cc2)N=C=O)cc1                     | 1.7  | 9.1  |
| 12 | CO                                                  | 22.3 | 10.9 |
| 13 | OC(=O)c1[nH]c2cc(O)c(O)cc2c1                        | 10.6 | 18.9 |
| 14 | COCO                                                | 18.5 | 7.9  |
| 15 | O=C1CCC(=O)O1                                       | 16   | 9.5  |
| 16 | CC(=O)Nc1cccc1                                      | 13.5 | 6.5  |
| 17 | NNc1cccc1                                           | 14   | 6.6  |
| 18 | CNN                                                 | 14.8 | 6.4  |
| 19 | S=C=S                                               | 0.6  | 9.9  |
| 20 | Oc1ccc(O)cc1                                        | 27.2 | 18.2 |
| 21 | O=C1OC(=O)c2cccc12                                  | 4.1  | 11.4 |
| 22 | CC(N)=S                                             | 20.2 | 12.4 |
| 23 | CCNCC                                               | 6.1  | 14.9 |
| 24 | CC1=CN([C@@H]2O[C@H](CO)[C@@H](O)[C@H]2O)C(=O)NC1=O | 32.8 | 17.1 |
| 25 | OC(F)(C(F)F)C(F)(F)F                                | 14.7 | 5.0  |
| 26 | COCCOC                                              | 6    | 16.0 |
| 27 | OC(=O)C(O)=O                                        | 26   | 18.5 |
| 28 | OCC(F)(F)F                                          | 16.4 | 7.9  |
| 29 | OCCSCCO                                             | 19.8 | 12.4 |
| 30 | [Cl]                                                | 0    | 10.6 |
| 31 | O                                                   | 42.3 | 20.5 |
| 32 | CC(O)C(O)=O                                         | 28.4 | 18.3 |
| 33 | Cl                                                  | 5.3  | 12.5 |
| 34 | OCC(O)C(O)C(O)CO                                    | 36   | 20.4 |
| 35 | CN=C=S                                              | 10.1 | -0.2 |
| 36 | O[N+](=[O-])=O                                      | 18.6 | 5.1  |
| 37 | COCCOC                                              | 6    | 16.0 |
| 38 | CC(CO)[N+](=[O-])=O                                 | 15.4 | 7.6  |
| 39 | CCCCCCCCCCCCCCCCO                                   | 8.1  | 1.5  |
| 40 | N=C=O                                               | 13.6 | 7.1  |
| 41 | CCO[Si](OCC)(OCC)OCC                                | 0.6  | 7.0  |
| 42 | CO[N+](=[O-])=O                                     | 4.8  | 14.0 |
| 43 | [Ca++].NC#N                                         | 16.8 | 6.8  |

|    |                                              |      |      |
|----|----------------------------------------------|------|------|
| 44 | [O-][O+]=O                                   | 0    | 8.7  |
| 45 | Cl[S](Cl)(=O)=O                              | 0    | 8.5  |
| 46 | OCCCCO.OC(=O)C=C.OC(=O)C=C                   | 4.2  | 10.7 |
| 47 | CO                                           | 10   | 21.8 |
| 48 | N#CC#N                                       | 0    | 9.1  |
| 49 | Oc1c(cc(cc1[N+](O-)=O)[N+](O-)=O)[N+](O-)=O) | 6    | 13.5 |
| 50 | Cl[P](Cl)(Cl)=O                              | 0    | 7.1  |
| 51 | O[P](O)(O)=O                                 | 28.4 | 21.5 |
| 52 | CCCC(F)(F)C(F)(F)C(O)(F)F                    | 9.9  | 2.5  |
| 53 | OO                                           | 42.7 | 21.8 |
| 54 | OCCCCO                                       | 23.2 | 7.6  |
| 55 | CCCO                                         | 17.4 | 5.5  |
| 56 | N#CSC#N                                      | 0    | 9.0  |
| 57 | OCCOc1ccccc1                                 | 14.3 | 6.0  |
| 58 | CCO                                          | 19.4 | 9.5  |
| 59 | OCCc1ccccc1                                  | 11.2 | 3.8  |
| 60 | CCCCCCCO                                     | 11.7 | 4.8  |
| 61 | CF                                           | 9.5  | 2.8  |
| 62 | OCCOC(=O)C=C                                 | 13.4 | 6.4  |
| 63 | OCCO.O[S](O)=O                               | 5.1  | 15.8 |
| 64 | CN=C=O                                       | 2.5  | 9.7  |
| 65 | [Br]                                         | 0    | 13.1 |
| 66 | C[SiH3]                                      | 0    | 8.1  |
| 67 | C                                            | 0    | 10.8 |
| 68 | OC(=O)CS                                     | 20   | 12.9 |
| 69 | OCCN1CCCC1=O                                 | 15.7 | 8.9  |
| 70 | BrC#N                                        | 0    | 6.5  |
| 71 | C1CCCCCCCCCCC1                               | 0    | 7.3  |
| 72 | CCN=C=S                                      | 9    | 1.5  |
| 73 | OCCOCCOCCOC=C                                | 6.6  | 15.3 |

| CHEMBERTa_zinc-base-v1 |                            |                  |                   |
|------------------------|----------------------------|------------------|-------------------|
| No.                    | SMILES                     | $\delta p$ (exp) | $\delta p$ (pred) |
| 1                      | SC#N                       | 8.9              | 15.4              |
| 2                      | CC1COC(=O)O1               | 18               | 10.1              |
| 3                      | NCCO                       | 15.5             | 6.5               |
| 4                      | Cc1ccon1                   | 14.8             | 4.6               |
| 5                      | O=C1OCC=C1                 | 19.8             | 12.2              |
| 6                      | O=C1c2ccccc2C(=O)c3ccccc13 | 7.6              | 13.7              |
| 7                      | CC(=C)C(Cl)=O              | 10.6             | 4.0               |
| 8                      | c1ccnnc1                   | 17.4             | 7.7               |

|    |                           |      |      |
|----|---------------------------|------|------|
| 9  | OC=O                      | 10   | 16.4 |
| 10 | Brc1ccc(cc1)C#N           | 9.3  | 16.5 |
| 11 | CCCCCCCCCCC               | 0    | 6.0  |
| 12 | Fc1c(F)c(F)c(F)c(F)c1F    | 0    | 6.9  |
| 13 | S=C=S                     | 0    | 11.6 |
| 14 | CC1OC(=O)OC1C             | 16.8 | 8.9  |
| 15 | ClC(Cl)(Cl)Cl             | 0    | 8.9  |
| 16 | O=C=S                     | 3.7  | 11.5 |
| 17 | CC\C(C)=N\O               | 4.9  | 11.9 |
| 18 | Cc1cncn1                  | 12.3 | 4.2  |
| 19 | Clc1cc(Cl)c(Cl)cc1Cl      | 10.7 | 2.8  |
| 20 | Clc1ccc(cc1)C#N           | 8    | 15.2 |
| 21 | CC(=C)C(C)=O              | 12.1 | 4.6  |
| 22 | C1OC1C2CO2                | 14.4 | 7.6  |
| 23 | CCCCOC(=O)/C=C/C(=O)OCCCC | 3    | 9.0  |
| 24 | CO                        | 12.3 | 5.4  |
| 25 | NC1(CC1)C(O)=O            | 6.3  | 12.4 |
| 26 | CCOCC.OCC(O)CO.OC(O)=O    | 18.5 | 11.0 |
| 27 | CCN=[CH+]                 | 15.2 | 9.3  |
| 28 | ClC(Cl)(Cl)C=O            | 7.4  | 14.4 |
| 29 | O=[S]=O                   | 8.4  | 17.0 |
| 30 | CC(=O)Nc1ccccc1           | 14.4 | 7.8  |
| 31 | CC(Cl)CCl                 | 7.1  | 13.9 |
| 32 | s1cnc2ccccc12             | 5.2  | 12.6 |
| 33 | ClC1(Cl)CCCC(Cl)(Cl)C1=O  | 14   | 6.8  |
| 34 | OC(=O)C(O)=O              | 17   | 9.5  |
| 35 | Cc1occc1                  | 2.8  | 9.8  |
| 36 | Sc1cc(Cl)c(Cl)cc1Cl       | 4.5  | 13.4 |
| 37 | Cn1ccnc1                  | 15.6 | 7.3  |
| 38 | CC(=O)C(C)=O              | 5.1  | 13.1 |
| 39 | o1cccn1                   | 13.4 | 7.0  |
| 40 | O=CC=O                    | 17   | 11.0 |
| 41 | CN=C=S                    | 16.2 | 4.8  |
| 42 | ClC(Cl)(Cl)C=C            | 15.5 | 4.5  |
| 43 | FC(F)=C(F)F               | 0    | 6.4  |
| 44 | [Ca++].NC#N               | 27.6 | 13.5 |
| 45 | C/C=C/C=O                 | 14.9 | 8.9  |
| 46 | O=C\C=C\C\c1ccccc1        | 12.4 | 6.2  |
| 47 | [O-][O+]=O                | 4.2  | 14.7 |
| 48 | Cl[S](Cl)(=O)=O           | 7.2  | 14.7 |
| 49 | CO                        | 5    | 13.0 |
| 50 | CC(=O)C#N                 | 18.9 | 10.3 |

|    |                            |      |      |
|----|----------------------------|------|------|
| 51 | N#CC#N                     | 11.8 | 17.8 |
| 52 | NC=O                       | 26.2 | 15.4 |
| 53 | Nc1cccn1                   | 8.1  | 15.9 |
| 54 | OCCCCO                     | 13.5 | 6.7  |
| 55 | C/C=C/C#N                  | 18.8 | 11.3 |
| 56 | CC(=C)C(O)=O               | 2.8  | 9.9  |
| 57 | Cl[S](Cl)=O                | 6.4  | 14.3 |
| 58 | [nH]1ccc2ccccc12           | 7.5  | 13.6 |
| 59 | O=C1C(=O)c2ccccc2c3ccccc13 | 17.1 | 9.1  |
| 60 | CNC=O                      | 18.8 | 13.1 |
| 61 | ClC(Cl)(Cl)Cl              | 8.3  | 0.4  |
| 62 | OCC(O)CO.OC(O)=O           | 25.5 | 13.7 |
| 63 | Nc1ccncc1                  | 16.1 | 8.8  |
| 64 | s1ccnc1                    | 18.8 | 5.4  |
| 65 | CNC(C)=O                   | 17   | 6.4  |
| 66 | O=C(C#N)C#N                | 6.3  | 14.6 |
| 67 | C1CCCCCCCCCCC1             | 0    | 5.9  |
| 68 | CC(Cl)=C(Cl)Cl             | 15.7 | 7.8  |
| 69 | OCCOCCOCCO                 | 12.5 | 6.7  |
| 70 | O=Cc1occc1                 | 14.9 | 9.0  |
| 71 | CCCCCCCCC(C)(O)Oc1ccccc1   | 10.2 | 4.3  |
| 72 | CCN=C=S                    | 14.7 | 4.5  |

| <b>CHEMBERTa_77M-MTR</b> |                                                         |                  |                   |
|--------------------------|---------------------------------------------------------|------------------|-------------------|
| No.                      | SMILES                                                  | $\delta d$ (exp) | $\delta d$ (pred) |
| 1                        | CC1COC(=O)O1                                            | 20               | 17.2              |
| 2                        | CC(CCl)OC(C)CCl                                         | 19               | 14.6              |
| 3                        | CC(C)(C)Cl                                              | 15.6             | 17.8              |
| 4                        | C[Si](C)(C)O[Si](C)(C)O[Si](C)(C)C                      | 12.2             | 9.6               |
| 5                        | C#N                                                     | 12.3             | 14.6              |
| 6                        | CC\C(C)=NO                                              | 14.7             | 16.7              |
| 7                        | ClCCCCl                                                 | 18               | 15.9              |
| 8                        | C[Si](C)(C)O[Si](C)(C)O[Si](C)(C)O[Si](C)(C)C           | 11.7             | 14.1              |
| 9                        | C[N+]1([O-])CCOCC1                                      | 19               | 16.8              |
| 10                       | Cl[SiH](Cl)Cl                                           | 14.2             | 16.7              |
| 11                       | ClCCCCl                                                 | 18               | 15.7              |
| 12                       | Clc1ccc(cc1)C(Cl)(Cl)Cl                                 | 20.3             | 17.8              |
| 13                       | CC=C(C)C                                                | 14.7             | 16.8              |
| 14                       | ClC1(Cl)CCCC(Cl)(Cl)C1=O                                | 19.5             | 17.1              |
| 15                       | NC(=O)C=C                                               | 15.8             | 18.3              |
| 16                       | COc1ccc2nccc([C@@H](O)[C@@H]3C[C@H]4CCN3C[C@H]4C=C)c2c1 | 19               | 16.4              |

|    |                                                                  |      |      |
|----|------------------------------------------------------------------|------|------|
| 17 | <chem>CIC(Cl)C(Cl)Cl</chem>                                      | 18.8 | 16.4 |
| 18 | <chem>CCSC#N</chem>                                              | 15.4 | 17.4 |
| 19 | <chem>OC(F)(C(F)F)C(F)(F)F</chem>                                | 17.2 | 13.0 |
| 20 | <chem>CN(C)[P](=O)(N(C)C)N(C)C</chem>                            | 18.5 | 16.4 |
| 21 | <chem>COc1c(Cl)cc(Cl)cc1Cl</chem>                                | 21   | 19.0 |
| 22 | <chem>IC=C</chem>                                                | 18   | 16.0 |
| 23 | <chem>[Cl]</chem>                                                | 17.3 | 15.3 |
| 24 | <chem>NC(=O)NC(N)=O</chem>                                       | 20   | 17.0 |
| 25 | <chem>CN=C=S</chem>                                              | 17.3 | 13.9 |
| 26 | <chem>O[N+](=[O-])=O</chem>                                      | 13.5 | 16.2 |
| 27 | <chem>S</chem>                                                   | 17.9 | 15.3 |
| 28 | <chem>Cc1cccc(C)c1C</chem>                                       | 18   | 20.1 |
| 29 | <chem>CCO[Si](OCC)(OCC)OCC</chem>                                | 13.9 | 15.9 |
| 30 | <chem>CNCC(O)c1ccc(O)c(O)c1</chem>                               | 20.5 | 18.4 |
| 31 | <chem>FC(F)(F)C(F)(F)C(F)(F)C(F)(F)C(F)(F)F</chem>               | 11.3 | 14.6 |
| 32 | <chem>IC[CH]=[C]=[CH2]</chem>                                    | 17.4 | 19.6 |
| 33 | <chem>[O-][O+]=O</chem>                                          | 19.8 | 14.6 |
| 34 | <chem>FC(F)(F)C1(F)C(F)(F)C(F)(F)C(F)(F)C(F)(F)C1(F)F</chem>     | 12.4 | 14.8 |
| 35 | <chem>C[S](C)(=O)=O</chem>                                       | 19   | 16.7 |
| 36 | <chem>FC(F)(F)C(F)(F)C(F)(F)C(F)(F)C(F)(F)C(F)(F)C(F)(F)F</chem> | 12   | 14.9 |
| 37 | <chem>CC(C)C=C</chem>                                            | 14   | 16.0 |
| 38 | <chem>CN(C)CCOC(=O)COc1ccc(Cl)cc1</chem>                         | 16   | 18.2 |
| 39 | <chem>CIP(Cl)Cl</chem>                                           | 18.4 | 16.3 |
| 40 | <chem>C1CO1</chem>                                               | 15.6 | 18.3 |
| 41 | <chem>CIC=C(Cl)Cl</chem>                                         | 18   | 15.9 |
| 42 | <chem>Cl[P](Cl)(Cl)=O</chem>                                     | 18.1 | 16.1 |
| 43 | <chem>CCC=C</chem>                                               | 13.2 | 15.7 |
| 44 | <chem>FC(F)(F)C(F)(F)C(F)(F)C(F)(F)C(F)(F)C(F)(F)F</chem>        | 12.1 | 14.1 |
| 45 | <chem>Cc1cc(C)cc(C)c1</chem>                                     | 18   | 20.0 |
| 46 | <chem>CCCCCCCCCCCCCCCC(=O)OCCCC</chem>                           | 14.5 | 16.5 |
| 47 | <chem>N#CSC#N</chem>                                             | 18.1 | 8.3  |
| 48 | <chem>FC(F)Cl</chem>                                             | 12.3 | 14.4 |
| 49 | <chem>FC(F)(F)C(F)(F)C(F)(F)C(F)(F)F</chem>                      | 10.6 | 13.8 |
| 50 | <chem>IC(=C)C=C</chem>                                           | 17.2 | 19.3 |
| 51 | <chem>CICCCCCI</chem>                                            | 18.3 | 15.9 |
| 52 | <chem>CICCOCCCI</chem>                                           | 18.8 | 15.7 |
| 53 | <chem>OCCO.O[S](O)=O</chem>                                      | 20   | 16.7 |
| 54 | <chem>[Br]</chem>                                                | 18.2 | 16.1 |
| 55 | <chem>CCCC</chem>                                                | 14.1 | 16.1 |
| 56 | <chem>CICC=C</chem>                                              | 17   | 15.0 |
| 57 | <chem>IC(=C)C=C</chem>                                           | 19.9 | 16.7 |
| 58 | <chem>OC(=O)CS</chem>                                            | 16   | 18.6 |

|    |          |      |      |
|----|----------|------|------|
| 59 | C1CCCCC1 | 18   | 16.0 |
| 60 | BrC#N    | 18.3 | 16.0 |
| 61 | CCC      | 13.1 | 16.0 |
| 62 | CCC(C)C  | 13.8 | 16.2 |
| 63 | ICI      | 22   | 17.8 |
| 64 | CCN=C=S  | 17.2 | 12.7 |

| <b>CHEMBERTa_77M-MTR</b> |                                                          |                  |                   |
|--------------------------|----------------------------------------------------------|------------------|-------------------|
| No.                      | SMILES                                                   | $\delta h$ (exp) | $\delta h$ (pred) |
| 1                        | SC#N                                                     | 10.9             | 5.0               |
| 2                        | C[P](F)(F)=O                                             | 8.4              | -0.9              |
| 3                        | CC=NO                                                    | 20.2             | 13.5              |
| 4                        | OC=O                                                     | 14               | 22.8              |
| 5                        | N                                                        | 18.8             | 12.7              |
| 6                        | S=C=S                                                    | 0.6              | 8.3               |
| 7                        | CN(C)C                                                   | 1.8              | 9.1               |
| 8                        | C#N                                                      | 9                | 0.4               |
| 9                        | C[C@H]1C[C@H](C)C(=O)[C@@H](C1)[C@H](O)CC2CC(=O)NC(=O)C2 | 13.8             | 7.5               |
| 10                       | O=C=S                                                    | 0                | 6.2               |
| 11                       | COO                                                      | 30               | 16.6              |
| 12                       | OCC1COCO1.OC2COCOC2                                      | 16.5             | 10.4              |
| 13                       | Cn1cnc2nc(Cl)nc(Cl)c12                                   | 14.2             | 7.5               |
| 14                       | CIC#C                                                    | 2.5              | 8.5               |
| 15                       | C1N2CN3CN1CN(C2)C3                                       | 16               | 5.4               |
| 16                       | CN[C@@H](C)[C@H](O)c1ccccc1                              | 24.1             | 12.3              |
| 17                       | CO                                                       | 22.3             | 14.5              |
| 18                       | OC(=O)c1[nH]c2cc(O)c(O)cc2c1                             | 10.6             | 19.6              |
| 19                       | O=C1CCC(=O)O1                                            | 16               | 8.2               |
| 20                       | CC(=O)Nc1ccccc1                                          | 13.5             | 7.0               |
| 21                       | CNN                                                      | 14.8             | 8.7               |
| 22                       | S=C=S                                                    | 0.6              | 6.8               |
| 23                       | CICCI                                                    | 7.1              | -0.4              |
| 24                       | COc1ccc2nccc([C@@H](O)[C@@H]3C[C@H]4CCN3C[C@@H]4C=C)c2c1 | 11               | 3.5               |
| 25                       | Oc1ccc(O)cc1                                             | 27.2             | 21.5              |
| 26                       | CC(N)=S                                                  | 20.2             | 11.1              |
| 27                       | CC(O)=S                                                  | 8.9              | 17.9              |
| 28                       | CC1=CN([C@@H]2O[C@H](CO)[C@@H](O)[C@H]2O)C(=O)NC1=O      | 32.8             | 16.5              |
| 29                       | OC(F)(C(F)F)C(F)(F)F                                     | 14.7             | 5.8               |
| 30                       | OC(=O)C(O)=O                                             | 26               | 17.2              |
| 31                       | C=CCN=[N+]=[N-]                                          | 13.4             | 6.2               |

|    |                                                                   |      |      |
|----|-------------------------------------------------------------------|------|------|
| 32 | <chem>Fc1c(F)c(F)c(c(F)c1F)C(=O)c2ccccc2</chem>                   | 5.4  | -0.7 |
| 33 | <chem>NN</chem>                                                   | 8.9  | 19.8 |
| 34 | <chem>O</chem>                                                    | 42.3 | 22.8 |
| 35 | <chem>CC(O)C(O)=O</chem>                                          | 28.4 | 20.5 |
| 36 | <chem>OCC(O)C(O)C(O)CO</chem>                                     | 36   | 23.1 |
| 37 | <chem>NC(=O)NC(N)=O</chem>                                        | 18.8 | 12.7 |
| 38 | <chem>O[N+](=[O-])=O</chem>                                       | 18.6 | 8.3  |
| 39 | <chem>S</chem>                                                    | 10.2 | 17.6 |
| 40 | <chem>CCCCCC(CC)COC(=O)CCCCCCCCC(=O)OCC(CC)CCCC</chem>            | 9    | 3.2  |
| 41 | <chem>N=C=O</chem>                                                | 13.6 | 5.3  |
| 42 | <chem>CCO[Si](OCC)(OCC)OCC</chem>                                 | 0.6  | 6.2  |
| 43 | <chem>[Ca++].NC#N</chem>                                          | 16.8 | 9.7  |
| 44 | <chem>[O-][O+]=O</chem>                                           | 0    | 6.8  |
| 45 | <chem>C[S](C)(=O)=O</chem>                                        | 12.3 | 6.0  |
| 46 | <chem>Cl[S](Cl)(=O)=O</chem>                                      | 0    | 6.0  |
| 47 | <chem>OCCCCO.OC(=O)C=C.OC(=O)C=C</chem>                           | 4.2  | 13.2 |
| 48 | <chem>CO</chem>                                                   | 10   | 20.9 |
| 49 | <chem>C1CNCCN1</chem>                                             | 6    | 14.1 |
| 50 | <chem>N#CC#N</chem>                                               | 0    | 7.9  |
| 51 | <chem>Oc1c(cc(cc1[N+](=[O-])=O)[N+](=[O-])=O)[N+](=[O-])=O</chem> | 6    | 11.7 |
| 52 | <chem>Cl[P](Cl)(Cl)=O</chem>                                      | 0    | 7.4  |
| 53 | <chem>O[P](O)(O)=O</chem>                                         | 28.4 | 20.6 |
| 54 | <chem>OO</chem>                                                   | 42.7 | 20.8 |
| 55 | <chem>CC#CC</chem>                                                | 7.6  | 1.9  |
| 56 | <chem>C=O</chem>                                                  | 15.4 | 5.3  |
| 57 | <chem>CF</chem>                                                   | 9.5  | 1.0  |
| 58 | <chem>CC#C</chem>                                                 | 9.2  | 2.7  |
| 59 | <chem>OCCO.O[Si](O)=O</chem>                                      | 5.1  | 18.4 |
| 60 | <chem>C[SiH3]</chem>                                              | 0    | 6.0  |
| 61 | <chem>CC(=O)Nc1ccc(O)cc1</chem>                                   | 13.9 | 20.4 |
| 62 | <chem>OC(=O)CS</chem>                                             | 20   | 13.9 |
| 63 | <chem>C1C=Cc2ccccc12</chem>                                       | 9    | 3.1  |
| 64 | <chem>OCCOCCOCCOC=C</chem>                                        | 6.6  | 13.0 |
| 65 | <chem>CCN=[N+]=[N-]</chem>                                        | 12.9 | 6.1  |

| <b>CHEMBERTa_77M-MTR</b> |                                         |                 |                  |
|--------------------------|-----------------------------------------|-----------------|------------------|
| <b>No.</b>               | <b>SMILES</b>                           | <b>δp (exp)</b> | <b>δp (pred)</b> |
| 1                        | <chem>SC#N</chem>                       | 8.9             | 16.5             |
| 2                        | <chem>CC1COC(=O)O1</chem>               | 18              | 11.1             |
| 3                        | <chem>O=C1c2ccccc2C(=O)c3ccccc13</chem> | 7.6             | 14.0             |
| 4                        | <chem>CC(=C)C(Cl)=O</chem>              | 10.6            | 4.2              |
| 5                        | <chem>CC1=CNC(=O)NC1=O</chem>           | 20.5            | 13.9             |

|    |                                     |      |      |
|----|-------------------------------------|------|------|
| 6  | <chem>c1ccnnc1</chem>               | 17.4 | 7.0  |
| 7  | <chem>OC=O</chem>                   | 10   | 17.6 |
| 8  | <chem>Brc1ccc(cc1)C#N</chem>        | 9.3  | 17.6 |
| 9  | <chem>[SiH3]C=C</chem>              | 2.6  | 9.4  |
| 10 | <chem>Nc1ncnc2nc[nH]c12</chem>      | 16   | 8.4  |
| 11 | <chem>Fc1c(F)c(F)c(F)c(F)c1F</chem> | 0    | 8.9  |
| 12 | <chem>S=C=S</chem>                  | 0    | 11.6 |
| 13 | <chem>CC1OC(=O)OC1C</chem>          | 16.8 | 10.0 |
| 14 | <chem>ClC(Cl)(Cl)Cl</chem>          | 0    | 6.8  |
| 15 | <chem>COO</chem>                    | 15   | 8.7  |
| 16 | <chem>Clc1cc(Cl)c(Cl)cc1Cl</chem>   | 10.7 | -0.3 |
| 17 | <chem>Clc1ccc(cc1)C#N</chem>        | 8    | 17.3 |
| 18 | <chem>[nH]1nnc2ccccc12</chem>       | 15.6 | 9.0  |
| 19 | <chem>C[N+](=O)[O-]CCOCC1</chem>    | 16.1 | 9.3  |
| 20 | <chem>CC(=C)C(C)=O</chem>           | 12.1 | 2.8  |
| 21 | <chem>NC1(CC1)C(O)=O</chem>         | 6.3  | 14.1 |
| 22 | <chem>CCN=[CH+]</chem>              | 15.2 | 7.6  |
| 23 | <chem>COC(Cl)Cl</chem>              | 12.9 | 4.4  |
| 24 | <chem>O=[S]=O</chem>                | 8.4  | 16.4 |
| 25 | <chem>s1cnc2ccccc12</chem>          | 5.2  | 13.0 |
| 26 | <chem>S=C=S</chem>                  | 5.8  | 14.4 |
| 27 | <chem>C[S](C)=O</chem>              | 16.4 | 6.2  |
| 28 | <chem>OC(=O)C(O)=O</chem>           | 17   | 9.7  |
| 29 | <chem>FC(F)F</chem>                 | 8.7  | 1.7  |
| 30 | <chem>CCCCCl</chem>                 | 6.9  | 0.5  |
| 31 | <chem>CC(=O)C(C)=O</chem>           | 5.1  | 11.7 |
| 32 | <chem>S</chem>                      | 6    | 15.1 |
| 33 | <chem>ClC(Cl)(Cl)C=C</chem>         | 15.5 | 5.0  |
| 34 | <chem>ClC(Cl)=C(Cl)Cl</chem>        | 5.7  | 14.7 |
| 35 | <chem>[Ca++].NC#N</chem>            | 27.6 | 14.1 |
| 36 | <chem>[O-][O+]=O</chem>             | 4.2  | 15.8 |
| 37 | <chem>ClCNCCI</chem>                | 7.5  | 1.1  |
| 38 | <chem>CC(C)=CC(C)=O</chem>          | 7.2  | 14.1 |
| 39 | <chem>Cl[S](Cl)(=O)=O</chem>        | 7.2  | 17.8 |
| 40 | <chem>Cc1ccc(Cl)c(Cl)c1</chem>      | 9.8  | 1.5  |
| 41 | <chem>COC(C)=C</chem>               | 4.2  | 10.6 |
| 42 | <chem>CO</chem>                     | 5    | 12.0 |
| 43 | <chem>CC(=O)C#N</chem>              | 18.9 | 10.4 |
| 44 | <chem>NC=O</chem>                   | 26.2 | 17.7 |
| 45 | <chem>Nc1cccn1</chem>               | 8.1  | 17.6 |
| 46 | <chem>CC=CCl</chem>                 | 6.9  | -0.5 |
| 47 | <chem>CCC=C</chem>                  | 1.3  | 7.6  |



|    |                                                                     |      |      |
|----|---------------------------------------------------------------------|------|------|
| 48 | <chem>Cc1cc(C)cc(C)c1</chem>                                        | 0.6  | 9.1  |
| 49 | <chem>C/C=C/C#N</chem>                                              | 18.8 | 10.7 |
| 50 | <chem>C1C(CI)(CI)C1(CI)CI</chem>                                    | 10.5 | 2.6  |
| 51 | <chem>N#CSC#N</chem>                                                | 13.5 | 5.5  |
| 52 | <chem>CCC(C)=C</chem>                                               | 1.8  | 9.2  |
| 53 | <chem>CCCCCC</chem>                                                 | 0    | 7.2  |
| 54 | <chem>FC(F)(F)C1(C(F)(F)F)C(F)(F)C(F)(F)C(F)(F)C(F)(F)C1(F)F</chem> | 0    | 8.1  |
| 55 | <chem>Cl[S](Cl)=O</chem>                                            | 6.4  | 18.0 |
| 56 | <chem>CC</chem>                                                     | 0    | 6.5  |
| 57 | <chem>CCc1ccc(CC)cc1</chem>                                         | 0    | 7.3  |
| 58 | <chem>CC(F)=O</chem>                                                | 14   | 7.5  |
| 59 | <chem>CIC=CCI</chem>                                                | 8    | -0.5 |
| 60 | <chem>OCCOC(=O)C=C</chem>                                           | 13.2 | 6.6  |
| 61 | <chem>C1C1CC1</chem>                                                | 7.2  | 0.8  |
| 62 | <chem>C1C(=O)C(CI)=O</chem>                                         | 3.8  | 11.7 |
| 63 | <chem>C[Si](C)(C)C=C</chem>                                         | 1    | 7.8  |
| 64 | <chem>CCCC</chem>                                                   | 0    | 8.0  |
| 65 | <chem>O=C1C(=O)c2ccccc2c3ccccc13</chem>                             | 17.1 | 8.0  |
| 66 | <chem>CCNC=O</chem>                                                 | 10   | 16.6 |
| 67 | <chem>C1CCCCC1</chem>                                               | 7.8  | -0.4 |
| 68 | <chem>OCC(O)CO.OC(O)=O</chem>                                       | 25.5 | 16.2 |
| 69 | <chem>CCC</chem>                                                    | 0    | 8.4  |
| 70 | <chem>Nc1ccncc1</chem>                                              | 16.1 | 9.3  |
| 71 | <chem>s1ccnc1</chem>                                                | 18.8 | 12.2 |
| 72 | <chem>CCC(C)C</chem>                                                | 0    | 9.4  |
| 73 | <chem>O=C(C#N)C#N</chem>                                            | 6.3  | 16.9 |
| 74 | <chem>CC(Cl)=C(Cl)Cl</chem>                                         | 15.7 | 5.8  |
| 75 | <chem>BrC(Br)=C</chem>                                              | 4.8  | 11.6 |
| 76 | <chem>Cc1ccc(c(c1[N+](=O)[O-])[N+](=O)[O-])[N+](=O)[O-]</chem>      | 3.5  | 11.2 |
| 77 | <chem>CCCCC1</chem>                                                 | 6.2  | -0.4 |
